# Supplementary material for: Discordant Information on Blinding in Trial Registries and Published Research: A Systematic Review
Source: PubMed Central journal article supplement (PMC11672156; doi:10.1001/jamanetworkopen.2024.52274), 2024-12-26
Supplement: jamanetwopen-e2452274-s001.pdf [file jamanetwopen-e2452274-s001.pdf]

## Supplemental Online Content

Zhang F, Zhu Y, Zhao S, et al., Discordant information on blinding in trial registries and published research: a systematic review. *JAMA Netw. Open.* 2024;7(12):e2452274. doi:10.1001/jamanetworkopen.2024.52274

eAppendix 1. Search Strategy for Exploratory Dataset

eAppendix 2. Search Strategy for Validation Dataset

eTable 1. Descriptions of the Different Types of Blinding Status of Individuals

eTable 2. Sample for Structured Data Extraction Form

eTable 3. List of Included Studies in Exploratory Dataset and Validation Dataset

eTable 4. List of Excluded Studies in Validation Dataset (With Reasons)

This supplemental material has been provided by the authors to give readers additional information about their work.

**eAppendix 1:** Search Strategy for exploratory dataset (PubMed, conducted on 28<sup>th</sup>-July, 2020)

1. "Systematic Reviews as Topic"[Mesh] OR "Systematic Review" [Publication Type] OR "Meta-Analysis as Topic"[Mesh] OR "Meta-Analysis" [Publication Type] OR "meta-analysis"[Title/Abstract] OR "meta analysis"[Title/Abstract] OR "systematic review"[Title/Abstract]
2. "randomized controlled trials as topic"[MeSH Major Topic] OR "clinical trials as topic"[MeSH Major Topic] OR "controlled clinical trials as topic"[MeSH Major Topic]
3. "randomized controlled trial\*"[Title/Abstract] OR "controlled clinical trial\*"[Title/Abstract] OR "clinical trial\*"[Title/Abstract] OR "controlled trial\*"[Title/Abstract] OR "trial\*"[Title/Abstract]
4. "safety"[Title/Abstract] OR "harm\*"[Title/Abstract] OR safe[Title/Abstract] OR poisoning[Title/Abstract] OR toxicity[Title/Abstract] OR tolerability[Title/Abstract] OR "complication\*"[Title/Abstract] OR "adverse event\*"[Title/Abstract] OR "adverse outcome\*"[Title/Abstract] OR "untoward effect\*"[Title/Abstract] OR "side effect\*"[Title/Abstract] OR adverse n2 reaction[Title/Abstract]
5. #2 or #3
6. #1 AND #4 AND #5
7. Protocol[Title] OR overview [Title] OR "narrative review" [Title]
8. #6 NOT #7
9. (#8) AND (("2018/01/02"[Date - Publication]: "2020/01/01"[Date - Publication])) AND (humans[Filter]) Filters: Humans
10. (#8) AND (("2015/01/01"[Date - Publication]: "2018/01/01"[Date - Publication])) AND (humans[Filter]) Filters: Humans

11. #9 or # 10

**Appendix 2:** Search Strategy for validation dataset (PubMed, conducted on 20<sup>th</sup>-December, 2023)

1. ("randomized controlled trial"[Publication Type] OR "controlled clinical trial"[Publication Type] OR "randomized"[Title/Abstract] OR "placebo"[Title/Abstract] OR "drug therapy"[MeSH Subheading] OR "randomly"[Title/Abstract] OR "trial"[Title/Abstract] OR "groups"[Title/Abstract]) NOT ("animals"[MeSH Terms] NOT "humans"[MeSH Terms])
2. 2000/01/01:2020/12/31[Print Publication Date]
3. "randomized controlled trial"[Publication Type]
4. "ISRCTN"[All Fields] OR "NCT"[All Fields] OR "ClinicalTrials.gov"[All Fields] OR "UMIN"[All Fields] OR "JapicCTI"[All Fields] OR "eudract"[All Fields] OR "ANZCTRN"[All Fields] OR "IRCT"[All Fields]
5. #1 and #2
6. #3 and #5
7. #4 and #6

**eTable 1.** Descriptions of the different types of blinding status of individuals

| Type of blinding status | Definition                                                                                                                                                                   | Examples described in RCTs included                                                                                                                               |
|-------------------------|------------------------------------------------------------------------------------------------------------------------------------------------------------------------------|-------------------------------------------------------------------------------------------------------------------------------------------------------------------|
| 1. Participant          | Participants are the individuals receiving the experimental interventions.                                                                                                   | Participants, patients, subjects, individuals, the people receiving the treatment                                                                                 |
| 2. Healthcare clinician | <i>“Healthcare clinicians include all personnel (for example, physicians, chiropractors, physiotherapists, nurses) who care for the participants during the trial.”</i> [23] | Healthcare providers, care providers, clinic staff, healthcare (medical management) practitioners, clinicians, caregivers, the people administering the treatment |
| 3. Data Collector       | <i>“Data collectors are the individuals who collect data on the trial outcomes.”</i> [23]                                                                                    | Data collector(s), persons collecting the data, data collection                                                                                                   |
| 4. Outcomes Assessor    | Outcomes assessors are the individuals who evaluates the outcome(s) of interest.                                                                                             | Outcome adjudicators, clinical assessment outcomes assessor, assessment and central analysis, evaluators, the people assessing the outcomes                       |
| 5. Data Analysts        | Data analysts are the individuals conducting the analysis of data                                                                                                            | Data analysts, data analysis, persons analysing (analysing) the data, persons who did the analysis, the people analysing the results/data                         |
| 6. open-label           | open-label means none of the participants nor Healthcare clinicians were blinded.                                                                                            | Open label, not blinded, unmasked.                                                                                                                                |

**eTable 2.** Sample for structured data extraction form

| ID | Identifier of clinical trial registry | Citation information                               | Regis_form | Publication year | Journal Rank | Region         | Center numbers | Disease                                     | Funding                           | Trials    | Website blinding application                                | Article blinding application                       |
|----|---------------------------------------|----------------------------------------------------|------------|------------------|--------------|----------------|----------------|---------------------------------------------|-----------------------------------|-----------|-------------------------------------------------------------|----------------------------------------------------|
| 1  | NCT00603512                           | Arthritis Care Res (Hoboken) 2011 Aug;63(8):1150-8 | NI         | 2011             | Q2           | Japan          | C19            | Active rheumatoid arthritis (RA)            | Pfizer                            | Not clear | Participant, Care Provider, Investigator, Outcomes Assessor | NI                                                 |
| 2  | NCT00527735                           | Ann Oncol, 2013, 24: 75-83                         | Pro        | 2013             | Q1           | 7 countries    | C32            | Extensive-disease-small-cell lung cancer    | Bristol-Myers Squibb              | Not clear | Participant, Investigator                                   | NI                                                 |
| 3  | NCT00528372                           | Diabet Med, 2015, 32: 531-41                       | Pro        | 2015             | Q2           | Canada, Mexico | C85            | Type 2 diabetes                             | AstraZeneca, Bristol-Myers Squibb | Not clear | Participant, Investigator                                   | Investigators, other clinic staff and participants |
| 4  | NCT00687297                           | J Thorac Oncol, 2013, 8: 1075-83                   | Retro      | 2013             | Q1           | United States  | C26            | Advanced non-small-cell lung cancer (NSCLC) | PrECOG, LLC.                      | Not clear | Participant, Care Provider, Investigator, Outcomes Assessor | Patients                                           |

**eTable 3.** List of Included Studies in Exploratory Dataset and Validation Dataset

| <b>Exclusion list</b> |                     |                                                    |
|-----------------------|---------------------|----------------------------------------------------|
| 1                     | Exploratory Dataset | Arthritis Care Res (Hoboken) 2011 Aug;63(8):1150-8 |
| 2                     | Exploratory Dataset | Ann Oncol, 2013, 24: 75-83                         |
| 3                     | Exploratory Dataset | Diabet Med, 2015, 32: 531-41                       |
| 4                     | Exploratory Dataset | J Thorac Oncol, 2013, 8: 1075-83                   |
| 5                     | Exploratory Dataset | Diabetes Obes Metab 2013 Oct;15(10):906-14         |
| 6                     | Exploratory Dataset | N Engl J Med 2011 Mar 3;364(9):818-28              |
| 7                     | Exploratory Dataset | N Engl J Med 2016; 375:209-219                     |
| 8                     | Exploratory Dataset | N Engl J Med 2005 Dec 29;353(26):2747-57           |
| 9                     | Exploratory Dataset | Lancet Oncol 2010 Jan;11(1):21-8                   |
| 10                    | Exploratory Dataset | Am J Psychiatry 2010 Jun; 167(6): 668–675          |
| 11                    | Exploratory Dataset | JAMA 2006 May 3;295(17):2003-17                    |
| 12                    | Exploratory Dataset | JAMA 2013 Aug 7;310(5):488-95                      |
| 13                    | Exploratory Dataset | N Engl J Med, 2006, 355: 1525-38                   |
| 14                    | Exploratory Dataset | N Engl J Med, 2006, 355: 2542-50                   |
| 15                    | Exploratory Dataset | N Engl J Med 2011 Oct 6;365(14):1273-83            |
| 16                    | Exploratory Dataset | J Clin Oncol 2009 Nov 20;27(33):5529-37            |
| 17                    | Exploratory Dataset | J Clin Oncol, 2012, 30: 2509-15                    |
| 18                    | Exploratory Dataset | N Engl J Med, 2007, 357: 2666-76                   |
| 19                    | Exploratory Dataset | N Engl J Med 2009 Jan 8;360(2):129-39              |
| 20                    | Exploratory Dataset | N Engl J Med 2005 Nov 3;353(18):1912-25            |

|    |                     |                                                     |
|----|---------------------|-----------------------------------------------------|
| 21 | Exploratory Dataset | N Engl J Med 2005 Dec 8;353(23):2462-76             |
| 22 | Exploratory Dataset | N Engl J Med 2006 Feb 23;354(8):821-31              |
| 23 | Exploratory Dataset | N Engl J Med 2005 Oct 20;353(16):1659-72            |
| 24 | Exploratory Dataset | N Engl J Med 2008 May 22;358(21):2205-17            |
| 25 | Exploratory Dataset | N Engl J Med 2007 Nov 1;357(18):1799-809            |
| 26 | Exploratory Dataset | J Clin Oncol, 2013, 31: 3320-6                      |
| 27 | Exploratory Dataset | N Engl J Med 2007 May 3;356(18):1809-22             |
| 28 | Exploratory Dataset | J Clin Oncol, 2011, 29: 2004-10                     |
| 29 | Exploratory Dataset | J Clin Oncol, 2011, 29: 1997-2003                   |
| 30 | Exploratory Dataset | J Clin Oncol 2009 May 20;27(15):2523-9              |
| 31 | Exploratory Dataset | Lancet Oncol 2006 May;7(5):379-91                   |
| 32 | Exploratory Dataset | Gastroenterology 2008 Mar;134(3):688-95             |
| 33 | Exploratory Dataset | N Engl J Med 2007 May 31;356(22):2271-81            |
| 34 | Exploratory Dataset | Arthritis Rheum 2010 Jul;62(7):2101-8               |
| 35 | Exploratory Dataset | J Clin Oncol, 2010, 28: 2137-43                     |
| 36 | Exploratory Dataset | N Engl J Med 2007; 356:125-134                      |
| 37 | Exploratory Dataset | J Clin Oncol 2009 Nov 20;27(33):5538-46             |
| 38 | Exploratory Dataset | Lancet 2006 Oct 14;368(9544):1329-38                |
| 39 | Exploratory Dataset | J Clin Oncol 2010 Aug 1;28(22):3605-10              |
| 40 | Exploratory Dataset | Blood, 2010, 116: 5111-8                            |
| 41 | Exploratory Dataset | J Clin Oncol 2011 Jun 20;29(18):2459-65             |
| 42 | Exploratory Dataset | Lancet 2008 Nov 22;372(9652):1809-18                |
| 43 | Exploratory Dataset | Gut 2009 Jul;58(7):940-8 doi: 10.1136/gut2008159251 |
| 44 | Exploratory Dataset | N Engl J Med 2006 Dec 28;355(26):2733-43            |



|    |                     |                                             |
|----|---------------------|---------------------------------------------|
| 45 | Exploratory Dataset | N Engl J Med 2007; 357:2040-2048            |
| 46 | Exploratory Dataset | JAMA 2012;307(13):1383-1393                 |
| 47 | Exploratory Dataset | Clin Colorectal Cancer 2014 Jun;13(2):100-9 |
| 48 | Exploratory Dataset | Ann Intern Med 2005 Oct 18;143(8):559-69    |
| 49 | Exploratory Dataset | Diabetologia 2007 Feb;50(2):259-67          |
| 50 | Exploratory Dataset | Diabetes Care, 2011, 34: 2015-22            |
| 51 | Exploratory Dataset | J Clin Oncol 2013 Jan 10;31(2):195-202      |
| 52 | Exploratory Dataset | Am J Psychiatry 2010 Feb;167(2):181-9       |
| 53 | Exploratory Dataset | J Clin Oncol, 2010, 28: 3617-22             |
| 54 | Exploratory Dataset | J Clin Oncol 2013 Apr 10;31(11):1405-14     |
| 55 | Exploratory Dataset | J Clin Oncol 2010 Apr 1;28(10):1756-65      |
| 56 | Exploratory Dataset | Hum Vaccin 2011 Jul;7(7):768-75             |
| 57 | Exploratory Dataset | Eur J Cancer, 2011, 47: 2331-40             |
| 58 | Exploratory Dataset | Circulation 2008 Jun 10;117(23):3010-9      |
| 59 | Exploratory Dataset | Lancet 2008 Jun 21;371(9630):2093-100       |
| 60 | Exploratory Dataset | N Engl J Med 2007 May 10;356(19):1928-43    |
| 61 | Exploratory Dataset | N Engl J Med 2007 May 10;356(19):1915-27    |
| 62 | Exploratory Dataset | Rheumatology (Oxford), 2007, 46: 496-507    |
| 63 | Exploratory Dataset | N Engl J Med 2006 Nov 23;355(21):2203-16    |
| 64 | Exploratory Dataset | N Engl J Med 2010 Aug 19;363(8):711-23      |
| 65 | Exploratory Dataset | Int J Clin Pract 2010 Apr;64(5):562-76      |
| 66 | Exploratory Dataset | Diabetes Obes Metab 2007 Mar;9(2):194-205   |
| 67 | Exploratory Dataset | Ann Rheum Dis 2008 Aug;67(8):1096-103       |
| 68 | Exploratory Dataset | Lancet Oncol 2013 Dec;14(13):1326-36        |

|    |                     |                                              |
|----|---------------------|----------------------------------------------|
| 69 | Exploratory Dataset | N Engl J Med, 2008, 359: 2456-67             |
| 70 | Exploratory Dataset | J Clin Oncol 2013 Jan 20;31(3):359-64        |
| 71 | Exploratory Dataset | N Engl J Med, 2010, 362: 1477-90             |
| 72 | Exploratory Dataset | Curr Med Res Opin 2009 Jan;25(1):65-75       |
| 73 | Exploratory Dataset | N Engl J Med 2007 Jan 11;356(2):115-24       |
| 74 | Exploratory Dataset | Diabetes Obes Metab 2007 Mar;9(2):166-74     |
| 75 | Exploratory Dataset | Diabet Med 2007 Sep;24(9):955-61             |
| 76 | Exploratory Dataset | Diabetes Obes Metab 2008 Aug;10(8):675-82    |
| 77 | Exploratory Dataset | Lancet 2008 Feb 2;371(9610):395-403          |
| 78 | Exploratory Dataset | Horm Metab Res 2009 Dec;41(12):905-9         |
| 79 | Exploratory Dataset | Curr Med Res Opin 2010 Oct;26(10):2339-46    |
| 80 | Exploratory Dataset | N Engl J Med 2007 Nov 29;357(22):2237-47     |
| 81 | Exploratory Dataset | Curr Med Res Opin 2008 Jun;24(6):1669-82     |
| 82 | Exploratory Dataset | Lancet Oncol 2012 Mar;13(3):292-9            |
| 83 | Exploratory Dataset | Diabetes Obes Metab 2010 May;12(5):442-51    |
| 84 | Exploratory Dataset | Diabetes Care 2007 Aug;30(8):1979-87         |
| 85 | Exploratory Dataset | Ann Intern Med 2007 Jun 19;146(12):829-38    |
| 86 | Exploratory Dataset | N Engl J Med 2008 Jul 24;359(4):378-90       |
| 87 | Exploratory Dataset | Diabetes Obes Metab 2009 Feb;11(2):157-66    |
| 88 | Exploratory Dataset | Ann Rheum Dis 2008 Nov;67(11):1516-23        |
| 89 | Exploratory Dataset | Clin Exp Rheumatol Jul-Aug 2016;34(4):625-33 |
| 90 | Exploratory Dataset | Lancet, 2008, 371: 987-97                    |
| 91 | Exploratory Dataset | Arthritis Rheum 2008 Oct;58(10):2968-80      |
| 92 | Exploratory Dataset | J Clin Oncol 2009 Jun 1;27(16):2630-7        |

|     |                     |                                            |
|-----|---------------------|--------------------------------------------|
| 93  | Exploratory Dataset | JAMA, 2010, 304: 2154-60                   |
| 94  | Exploratory Dataset | Ann Rheum Dis 2010; 69(1):88-96            |
| 95  | Exploratory Dataset | J Clin Oncol 2013 Jan 20;31(3):373-9       |
| 96  | Exploratory Dataset | J Clin Oncol 2008 May 1;26(13):2178-85     |
| 97  | Exploratory Dataset | J Clin Oncol 2009 Jun 10;27(17):2823-30    |
| 98  | Exploratory Dataset | Lancet, 2006, 367: 29-35                   |
| 99  | Exploratory Dataset | N Engl J Med 2006 Oct 19;355(16):1672-81   |
| 100 | Exploratory Dataset | J Clin Oncol 2010 Feb 20;28(6):911-7       |
| 101 | Exploratory Dataset | Lancet Oncol, 2012, 13: 1225-33            |
| 102 | Exploratory Dataset | Circulation 2010 Mar 16;121(10):1176-87    |
| 103 | Exploratory Dataset | J Clin Oncol 2009 Aug 10;27(23):3822-9     |
| 104 | Exploratory Dataset | J Clin Oncol 2011 Aug 10;29(23):3120-5     |
| 105 | Exploratory Dataset | BMJ, 2006, 332: 22-7                       |
| 106 | Exploratory Dataset | Diabet Med, 2013, 30: 1472-6               |
| 107 | Exploratory Dataset | Diabetes Care 2009 Sep;32(9):1649-55       |
| 108 | Exploratory Dataset | Endocr J 2010;57(5):383-94                 |
| 109 | Exploratory Dataset | Lancet, 2011, 377: 1846-54                 |
| 110 | Exploratory Dataset | Br J Cancer 2008 Sep 16;99(6):852-7        |
| 111 | Exploratory Dataset | Obstet Gynecol 2009 Nov;114(5):999-1007    |
| 112 | Exploratory Dataset | Gastroenterology 2014 Mar;146(3):681-688e1 |
| 113 | Exploratory Dataset | JAMA 2006 Apr 5;295(13):1531-8             |
| 114 | Exploratory Dataset | Diabetes Obes Metab 2009 Jun;11(6):571-8   |
| 115 | Exploratory Dataset | Clin Ther 2007 Jun;29(6):1040-56           |
| 116 | Exploratory Dataset | Ann Oncol 2013 Apr;24(4):1032-7            |

|     |                     |                                                      |
|-----|---------------------|------------------------------------------------------|
| 117 | Exploratory Dataset | Clin Ther 2007 Jun;29(6):1027-39                     |
| 118 | Exploratory Dataset | JAMA 2006 Jul 5;296(1):47-55                         |
| 119 | Exploratory Dataset | Lancet Oncol 2009 Nov;10(11):1063-9                  |
| 120 | Exploratory Dataset | JAMA 2006 Jul 5;296(1):64-71                         |
| 121 | Exploratory Dataset | Curr Med Res Opin 2007 Apr;23(4):793-801             |
| 122 | Exploratory Dataset | JAMA 2006 Jul 5;296(1):56-63                         |
| 123 | Exploratory Dataset | Mod Rheumatol 2009;19(1):12-9                        |
| 124 | Exploratory Dataset | Scand J Rheumatol, 2008, 37: 142-50                  |
| 125 | Exploratory Dataset | J Clin Oncol 2012 May 20;30(15):1755-62              |
| 126 | Exploratory Dataset | N Engl J Med 2008 Jun 12;358(24):2560-72             |
| 127 | Exploratory Dataset | N Engl J Med, 2006, 355: 549-59                      |
| 128 | Exploratory Dataset | Am J Respir Crit Care Med 2008 Dec 1;178(11):1139-47 |
| 129 | Exploratory Dataset | Lancet 2009 May 2;373(9674):1525-31                  |
| 130 | Exploratory Dataset | Lancet Oncol 2012 Jan;13(1):33-42                    |
| 131 | Exploratory Dataset | Curr Med Res Opin 2008 Jul;24(7):1931-41             |
| 132 | Exploratory Dataset | N Engl J Med 2007 Nov 1;357(18):1810-20              |
| 133 | Exploratory Dataset | Arthritis Rheum 2008 Nov;58(11):3319-29              |
| 134 | Exploratory Dataset | Aliment Pharmacol Ther 2011 Jan;33(2):185-93         |
| 135 | Exploratory Dataset | N Engl J Med 2007 Jul 19;357(3):239-50               |
| 136 | Exploratory Dataset | N Engl J Med 2007 Jul 19;357(3):228-38               |
| 137 | Exploratory Dataset | J Arthroplasty 2009 Jan;24(1):1-9                    |
| 138 | Exploratory Dataset | N Engl J Med, 2008, 359: 1225-37                     |
| 139 | Exploratory Dataset | Lancet, 2008, 372: 1174-83                           |
| 140 | Exploratory Dataset | N Engl J Med, 2008, 358: 1547-59                     |

|     |                     |                                              |
|-----|---------------------|----------------------------------------------|
| 141 | Exploratory Dataset | N Engl J Med 2009; 360:1408-1417             |
| 142 | Exploratory Dataset | J Clin Oncol 2015 Mar 1;33(7):692-700        |
| 143 | Exploratory Dataset | J Clin Oncol 2011 May 20;29(15):2011-9       |
| 144 | Exploratory Dataset | Lancet Neurol 2006 Jun;5(6):493-500          |
| 145 | Exploratory Dataset | Clin Ther, 2008, 30: 2298-313                |
| 146 | Exploratory Dataset | Lancet 2007 Sep 15;370(9591):949-56          |
| 147 | Exploratory Dataset | Drugs Aging 2011 Jan 1;28(1):27-40           |
| 148 | Exploratory Dataset | Arthritis Res Ther 2010;12(1):R7             |
| 149 | Exploratory Dataset | J Rheumatol 2009 Sep;36(9):1991-9            |
| 150 | Exploratory Dataset | Lancet 2005 Oct 8;366(9493):1279-89          |
| 151 | Exploratory Dataset | Neurology, 2010, 75: 519-25                  |
| 152 | Exploratory Dataset | Ann Rheum Dis 2009 Jun;68(6):797-804         |
| 153 | Exploratory Dataset | Epilepsia, 2013, 54: 89-97                   |
| 154 | Exploratory Dataset | Lancet 2008 Aug 2;372(9636):375-82           |
| 155 | Exploratory Dataset | J Clin Oncol, 2011, 29: 884-9                |
| 156 | Exploratory Dataset | Drugs 2008;68(14):1975-2000                  |
| 157 | Exploratory Dataset | Drugs 2009;69(5):549-65                      |
| 158 | Exploratory Dataset | Gut 2009 Oct;58(10):1354-62                  |
| 159 | Exploratory Dataset | Arthritis Rheum 2008 Sep 15;59(9):1270-8     |
| 160 | Exploratory Dataset | Arthritis Rheum 2008 Apr;58(4):964-75        |
| 161 | Exploratory Dataset | N Engl J Med 2009 Feb 5;360(6):563-72        |
| 162 | Exploratory Dataset | Osteoporos Int 2009 Aug;20(8):1429-37        |
| 163 | Exploratory Dataset | Drug Alcohol Depend 2014 Mar 1; 136: 100–107 |
| 164 | Exploratory Dataset | Hypertension 2007 May;49(5):1047-55          |

|     |                     |                                                          |
|-----|---------------------|----------------------------------------------------------|
| 165 | Exploratory Dataset | Lancet 2008 Jun 21;371(9630):2101-8                      |
| 166 | Exploratory Dataset | JAMA 2006 Dec 6;296(21):2572-81                          |
| 167 | Exploratory Dataset | JAMA 2008 Apr 2;299(13):1561-73                          |
| 168 | Exploratory Dataset | N Engl J Med, 2006, 354: 1685-97                         |
| 169 | Exploratory Dataset | Arthritis Rheum 2008 Jul;58(7):1981-91                   |
| 170 | Exploratory Dataset | Diabetes Care 2008 Jan;31(1):30-5                        |
| 171 | Exploratory Dataset | J Am Acad Dermatol, 2008, 58: 106-15                     |
| 172 | Exploratory Dataset | PLoS Clin Trials 2006 Jun;1(2):e11                       |
| 173 | Exploratory Dataset | Breast 2013 Oct;22(5):650-6                              |
| 174 | Exploratory Dataset | Arthritis Rheum 2011 Jun;63(6):1543-51                   |
| 175 | Exploratory Dataset | N Engl J Med, 2011, 364: 928-38                          |
| 176 | Exploratory Dataset | Lancet, 2008, 372: 1385-93                               |
| 177 | Exploratory Dataset | J Clin Oncol 2008 Sep 10;26(26):4244-52                  |
| 178 | Exploratory Dataset | Lancet, 2008, 372: 1394-402                              |
| 179 | Exploratory Dataset | J Clin Oncol, 2013, 31: 616-22                           |
| 180 | Exploratory Dataset | J Clin Oncol, 2009, 27: 2253-60                          |
| 181 | Exploratory Dataset | Ann Rheum Dis 2013 Jun;72(6):851-7                       |
| 182 | Exploratory Dataset | Gut 2011 Nov;60(11):1520-6                               |
| 183 | Exploratory Dataset | J Clin Oncol, 2011, 29: 1252-60                          |
| 184 | Exploratory Dataset | N Engl J Med 2009 Sep 17;361(12):1139-51                 |
| 185 | Exploratory Dataset | N Engl J Med, 2011, 365: 2473-83                         |
| 186 | Exploratory Dataset | Diabetes Care 2009 Apr;32(4):650-7                       |
| 187 | Exploratory Dataset | J Am Acad Child Adolesc Psychiatry 2011 Sep;50(9):903-14 |
| 188 | Exploratory Dataset | Arthritis Rheum 2008 Nov;58(11):3402-12                  |

|     |                     |                                               |
|-----|---------------------|-----------------------------------------------|
| 189 | Exploratory Dataset | Arthritis Rheum 2009 Apr;60(4):976-86         |
| 190 | Exploratory Dataset | Arthritis Rheum 2012 Aug;64(8):2504-17        |
| 191 | Exploratory Dataset | Gastroenterology 2008 Oct;135(4):1130-41      |
| 192 | Exploratory Dataset | Ann Oncol 2013 Sep;24(9):2382-9               |
| 193 | Exploratory Dataset | J Clin Oncol 2014 Sep 20;32(27):2940-50       |
| 194 | Exploratory Dataset | J Am Board Fam Med 2012 Jul-Aug;25(4):442-59  |
| 195 | Exploratory Dataset | Lancet, 2008, 371: 1665-74                    |
| 196 | Exploratory Dataset | N Engl J Med 2007 Feb 22;356(8):775-89        |
| 197 | Exploratory Dataset | N Engl J Med, 2017, 377: 338-351              |
| 198 | Exploratory Dataset | Am J Cardiol 2008 Dec 1;102(11):1495-501      |
| 199 | Exploratory Dataset | N Engl J Med 2006 Dec 7;355(23):2427-43       |
| 200 | Exploratory Dataset | Lancet 2011 Jan 22;377(9762):321-31           |
| 201 | Exploratory Dataset | Postgrad Med 2009 Mar;121(2):5-14             |
| 202 | Exploratory Dataset | J Clin Oncol, 2011, 29: 4286-93               |
| 203 | Exploratory Dataset | Circulation 2010 Jan 19;121(2):221-9          |
| 204 | Exploratory Dataset | Lancet Oncol 2010 Sep;11(9):853-60            |
| 205 | Exploratory Dataset | Chest 2011 Mar;139(3):591-599                 |
| 206 | Exploratory Dataset | Diabetes Obes Metab 2009 Dec;11(12):1145-52   |
| 207 | Exploratory Dataset | Int J Clin Pract 2009 Jan;63(1):46-55         |
| 208 | Exploratory Dataset | Diabetes Obes Metab 2009 Feb;11(2):167-76     |
| 209 | Exploratory Dataset | J Clin Oncol 2007 Jul 1;25(19):2664-70        |
| 210 | Exploratory Dataset | J Clin Oncol 2010 Apr 20;28(12):2024-31       |
| 211 | Exploratory Dataset | Diabetes Res Clin Pract 2009 Jan;83(1):106-16 |
| 212 | Exploratory Dataset | N Engl J Med 2009 Dec 10;361(24):2342-52      |

|     |                     |                                                    |
|-----|---------------------|----------------------------------------------------|
| 213 | Exploratory Dataset | Arthritis Rheum, 2011, 63: 3383-91                 |
| 214 | Exploratory Dataset | Diabetes Obes Metab 2011 Apr;13(4):348-56          |
| 215 | Exploratory Dataset | Diab Vasc Dis Res 2011 Apr;8(2):125-35             |
| 216 | Exploratory Dataset | Clin Infect Dis, 2008, 46: 1157-64                 |
| 217 | Exploratory Dataset | Lancet 2009 Jul 18;374(9685):210-21                |
| 218 | Exploratory Dataset | Clin Drug Investig, 2008, 28: 625-34               |
| 219 | Exploratory Dataset | Aliment Pharmacol Ther 2010 Oct;32(7):872-83       |
| 220 | Exploratory Dataset | Oncology 2018;94(1):39-46                          |
| 221 | Exploratory Dataset | PLoS One 2013;8(3):e60094                          |
| 222 | Exploratory Dataset | Lancet, 2008, 371: 1675-84                         |
| 223 | Exploratory Dataset | J Neurol Neurosurg Psychiatry 2011 Sep;82(9):970-7 |
| 224 | Exploratory Dataset | Br J Haematol 2010 May;149(3):426-35               |
| 225 | Exploratory Dataset | Lancet Oncol 2010 Jul;11(7):619-26                 |
| 226 | Exploratory Dataset | J Am Coll Cardiol 2008 Dec 16;52(25):2127-34       |
| 227 | Exploratory Dataset | Diab Vasc Dis Res 2011 Apr;8(2):150-9              |
| 228 | Exploratory Dataset | Diabetol Metab Syndr 2012 Jul 24;4(1):36           |
| 229 | Exploratory Dataset | J Pain Res 2013 Oct 25;6:743-53                    |
| 230 | Exploratory Dataset | Ann Rheum Dis 2007 Sep; 66(9): 1178–1183           |
| 231 | Exploratory Dataset | Diabetes Care 2009 Jan;32(1):84-90                 |
| 232 | Exploratory Dataset | Pediatr Pulmonol, 2011, 46: 111-8                  |
| 233 | Exploratory Dataset | J Clin Oncol 2012 Jul 20;30(21):2585-92            |
| 234 | Exploratory Dataset | J Gastrointest Cancer 2012 Dec;43(4):562-9         |
| 235 | Exploratory Dataset | Clin Cancer Res 2012 Sep 1;18(17):4841-9           |
| 236 | Exploratory Dataset | Eur J Cancer 2012 Nov;48(16):3082-92               |



|     |                     |                                                 |
|-----|---------------------|-------------------------------------------------|
| 237 | Exploratory Dataset | Lancet 2011 Mar 5;377(9768):813-22              |
| 238 | Exploratory Dataset | Leuk Lymphoma 2013 Feb;54(2):321-8              |
| 239 | Exploratory Dataset | Asia Pac J Clin Oncol 2012 Sep;8(3):232-43      |
| 240 | Exploratory Dataset | N Engl J Med 2009 Sep 3;361(10):947-57          |
| 241 | Exploratory Dataset | N Engl J Med 2010 Jun 24;362(25):2380-8         |
| 242 | Exploratory Dataset | N Engl J Med 2011 Jun 30;364(26):2517-26        |
| 243 | Exploratory Dataset | N Engl J Med 2011 Aug 25;365(8):689-98          |
| 244 | Exploratory Dataset | Lancet 2016 May 14;387(10032):2008-16           |
| 245 | Exploratory Dataset | Diabetes Obes Metab 2011 Jun;13(6):567-76       |
| 246 | Exploratory Dataset | Lancet Oncol, 2012, 13: 154-62                  |
| 247 | Exploratory Dataset | J Clin Endocrinol Metab 2012 May;97(5):1615-22  |
| 248 | Exploratory Dataset | N Engl J Med 2013 Feb 21;368(8):709-18          |
| 249 | Exploratory Dataset | N Engl J Med 2008 Jun 26;358(26):2765-75        |
| 250 | Exploratory Dataset | J Clin Oncol 2011 Mar 20;29(9):1125-32          |
| 251 | Exploratory Dataset | Support Care Cancer 2014 Mar;22(3):679-87       |
| 252 | Exploratory Dataset | Lancet 2008 Jul 5;372(9632):31-9                |
| 253 | Exploratory Dataset | J Clin Oncol, 2010, 28: 3239-47                 |
| 254 | Exploratory Dataset | J Clin Oncol 2010 Feb 20;28(6):1061-8           |
| 255 | Exploratory Dataset | Curr Med Res Opin 2008 Feb;24(2):537-50         |
| 256 | Exploratory Dataset | Clin Cancer Res, 2012, 18: 555-67               |
| 257 | Exploratory Dataset | Neuropsychopharmacology 2012 Mar;37(4):996-1004 |
| 258 | Exploratory Dataset | Ann Rheum Dis 2011 May;70(5):747-54             |
| 259 | Exploratory Dataset | J Clin Oncol 2010 Nov 1;28(31):4706-13          |
| 260 | Exploratory Dataset | Lung Cancer 2010 Jun;68(3):420-6                |

|     |                     |                                                |
|-----|---------------------|------------------------------------------------|
| 261 | Exploratory Dataset | Breast Cancer Res Treat 2013 Feb;137(3):755-66 |
| 262 | Exploratory Dataset | Lancet Oncol 2011 Apr;12(4):369-76             |
| 263 | Exploratory Dataset | Diabetes Care 2009 Sep;32(9):1656-62           |
| 264 | Exploratory Dataset | Epilepsia, 2016, 57: 210-21                    |
| 265 | Exploratory Dataset | Lancet, 2012, 379: 2270-8                      |
| 266 | Exploratory Dataset | Arthritis Rheum 2010 Apr;62(4):917-28          |
| 267 | Exploratory Dataset | N Engl J Med 2008 Jun 26;358(26):2776-86       |
| 268 | Exploratory Dataset | Lancet 2009 May 16;373(9676):1673-80           |
| 269 | Exploratory Dataset | J Clin Oncol 2010 Nov 1;28(31):4697-705        |
| 270 | Exploratory Dataset | N Engl J Med 2013 Sep 12;369(11):1023-34       |
| 271 | Exploratory Dataset | J Clin Oncol 2011 Mar 10;29(8):1059-66         |
| 272 | Exploratory Dataset | Ann Rheum Dis 2012 Apr;71(4):541-8             |
| 273 | Exploratory Dataset | Ann Oncol, 2011, 22: 2057-2067                 |
| 274 | Exploratory Dataset | J Clin Psychopharmacol 2009 Aug;29(4):350-7    |
| 275 | Exploratory Dataset | Lancet 2011 Jan 29;377(9763):393-402           |
| 276 | Exploratory Dataset | Br J Cancer, 2011, 105: 618-27                 |
| 277 | Exploratory Dataset | N Engl J Med 2009 Aug 6;361(6):594-604         |
| 278 | Exploratory Dataset | Respirology 2009 Apr;14(3):384-92              |
| 279 | Exploratory Dataset | Invest New Drugs, 2012, 30: 1216-23            |
| 280 | Exploratory Dataset | J Clin Oncol, 2015, 33: 4007-14                |
| 281 | Exploratory Dataset | N Engl J Med 2011 Nov 24;365(21):1980-9        |
| 282 | Exploratory Dataset | Lancet Oncol, 2013, 14: 88-96                  |
| 283 | Exploratory Dataset | Arch Intern Med 2009 Mar 23;169(6):616-25      |
| 284 | Exploratory Dataset | N Engl J Med 2016 Dec 8;375(23):2246-2254      |

|     |                     |                                                      |
|-----|---------------------|------------------------------------------------------|
| 285 | Exploratory Dataset | N Engl J Med 2011 Jan 13;364(2):105-15               |
| 286 | Exploratory Dataset | N Engl J Med 2007 Jul 5;357(1):28-38                 |
| 287 | Exploratory Dataset | Allergy Asthma Proc Jul-Aug 2010;31(4):280-9         |
| 288 | Exploratory Dataset | Diabetes Obes Metab 2009 May;11(5):506-15            |
| 289 | Exploratory Dataset | J Clin Oncol 2012 May 10;30(14):1620-7               |
| 290 | Exploratory Dataset | Gut 2011 Jun;60(6):780-7                             |
| 291 | Exploratory Dataset | Eur J Cancer, 2013, 49: 1609-18                      |
| 292 | Exploratory Dataset | J Clin Oncol, 2013, 31: 1719-25                      |
| 293 | Exploratory Dataset | Am J Respir Crit Care Med 2011 Jul 1;184(1):92-9     |
| 294 | Exploratory Dataset | J Child Adolesc Psychopharmacol 2011 Dec;21(6):581-8 |
| 295 | Exploratory Dataset | Thorax 2010 Jun;65(6):473-9                          |
| 296 | Exploratory Dataset | Arthritis Rheum 2007 Dec;56(12):3928-39              |
| 297 | Exploratory Dataset | Curr Med Res Opin 2010 May;26(5):1013-22             |
| 298 | Exploratory Dataset | J Diabetes Investig 2011 Nov 30;2(6):441-7           |
| 299 | Exploratory Dataset | J Clin Oncol 2012 Mar 20;30(9):921-9                 |
| 300 | Exploratory Dataset | Respiratory Medicine 2013;107(2):180-95              |
| 301 | Exploratory Dataset | BMC Pulmonary Medicine 2012;12:67                    |
| 302 | Exploratory Dataset | Clin Ther 2013 Jul;35(7):950-66                      |
| 303 | Exploratory Dataset | Diabetes Obes Metab 2010 Feb;12(2):167-77            |
| 304 | Exploratory Dataset | Diabetes Care 2010 Nov;33(11):2406-8                 |
| 305 | Exploratory Dataset | Diabetes Obes Metab 2012 Aug;14(8):745-52            |
| 306 | Exploratory Dataset | Int J Clin Pract 2011 Feb;65(2):154-64               |
| 307 | Exploratory Dataset | J Clin Oncol 2012 Oct 10;30(29):3596-603             |
| 308 | Exploratory Dataset | J Clin Oncol 2010 Mar 20;28(9):1547-53               |

|     |                     |                                                     |
|-----|---------------------|-----------------------------------------------------|
| 309 | Exploratory Dataset | J Clin Oncol, 2011, 29: 2215-22                     |
| 310 | Exploratory Dataset | N Engl J Med 2011 Sep 8;365(10):883-91              |
| 311 | Exploratory Dataset | Int Clin Psychopharmacol 2016 Mar;31(2):61-8        |
| 312 | Exploratory Dataset | J Clin Oncol 2012 Apr 1;30(10):1114-21              |
| 313 | Exploratory Dataset | Gastroenterology 2012 Jul;143(1):62-69e4            |
| 314 | Exploratory Dataset | N Engl J Med, 2012, 366: 310-20                     |
| 315 | Exploratory Dataset | Am J Cardiol 2009 Jun 15;103(12):1694-702           |
| 316 | Exploratory Dataset | Cancer 2010 Sep 15;116(18):4256-65                  |
| 317 | Exploratory Dataset | Lancet 2008 Aug 9;372(9637):449-56                  |
| 318 | Exploratory Dataset | J Clin Oncol 2012 Jan 10;30(2):134-41               |
| 319 | Exploratory Dataset | Lancet 2011 Dec 10;378(9808):2005-2012              |
| 320 | Exploratory Dataset | Lancet, 2016, 387: 760-9                            |
| 321 | Exploratory Dataset | N Engl J Med 2011 Sep 15;365(11):981-92             |
| 322 | Exploratory Dataset | Arthritis Rheum, 2012, 64: 970-81                   |
| 323 | Exploratory Dataset | JAMA 2013 Mar 27;309(12):1251-9                     |
| 324 | Exploratory Dataset | N Engl J Med 2010; 363:1889-1899                    |
| 325 | Exploratory Dataset | J Hematol Oncol 2012 Nov 29;5:71                    |
| 326 | Exploratory Dataset | J Clin Oncol 2011 Mar 10;29(8):1067-74              |
| 327 | Exploratory Dataset | Clin Colorectal Cancer 2015 Jun;14(2):72-80         |
| 328 | Exploratory Dataset | Clin Pharmacol Ther 2016 Oct;100(4):344-52          |
| 329 | Exploratory Dataset | Respir Med 2012 Feb;106(2):257-68                   |
| 330 | Exploratory Dataset | Ann Allergy Asthma Immunol 2011 Sep;107(3):258-65e2 |
| 331 | Exploratory Dataset | J Allergy Clin Immunol 2012 Aug;130(2):362-7e9      |
| 332 | Exploratory Dataset | Ann Rheum Dis 2011 May;70(5):799-804                |

|     |                     |                                           |
|-----|---------------------|-------------------------------------------|
| 333 | Exploratory Dataset | Ann Rheum Dis 2010 Aug;69(8):1430-5       |
| 334 | Exploratory Dataset | Ann Rheum Dis 2013 Jan;72(1):64-71        |
| 335 | Exploratory Dataset | N Engl J Med 2010 Dec 23;363(26):2487-98  |
| 336 | Exploratory Dataset | Eur J Cancer 2012 Mar;48(4):527-37        |
| 337 | Exploratory Dataset | J Clin Lipidol Jul-Aug 2010;4(4):272-8    |
| 338 | Exploratory Dataset | J Clin Oncol, 2015, 33: 4202-9            |
| 339 | Exploratory Dataset | Phys Sportsmed 2010 Jun;38(2):19-28       |
| 340 | Exploratory Dataset | N Engl J Med 2011 Feb 10;364(6):501-13    |
| 341 | Exploratory Dataset | J Clin Oncol 2012 Jun 1;30(16):1989-95    |
| 342 | Exploratory Dataset | J Clin Oncol 2010 Aug 1;28(22):3562-9     |
| 343 | Exploratory Dataset | J Clin Oncol 2010 Dec 20;28(36):5240-6    |
| 344 | Exploratory Dataset | Gastroenterology 2012 Aug;143(2):356-64e1 |
| 345 | Exploratory Dataset | JAMA, 2010, 303: 1707-15                  |
| 346 | Exploratory Dataset | Ann Oncol, 2012, 23: 1693-9               |
| 347 | Exploratory Dataset | Lancet Oncol 2014 Sep;15(10):1065-75      |
| 348 | Exploratory Dataset | N Engl J Med 2008 May 22;358(21):2218-30  |
| 349 | Exploratory Dataset | J Clin Oncol, 2012, 30: 34-41             |
| 350 | Exploratory Dataset | J Clin Oncol, 2012, 30: 2039-45           |
| 351 | Exploratory Dataset | Diabetes Care 2011 Mar;34(3):604-6        |
| 352 | Exploratory Dataset | J Clin Oncol 2013 Aug 10;31(23):2870-8    |
| 353 | Exploratory Dataset | Postgrad Med, 2011, 123: 220-7            |
| 354 | Exploratory Dataset | N Engl J Med 2012 Nov 1;367(18):1714-23   |
| 355 | Exploratory Dataset | N Engl J Med 2012 Apr 5;366(14):1287-97   |
| 356 | Exploratory Dataset | N Engl J Med 2010 Dec 23;363(26):2499-510 |

|     |                     |                                                            |
|-----|---------------------|------------------------------------------------------------|
| 357 | Exploratory Dataset | Clin Cancer Res 2015 Aug 15;21(16):3610-8                  |
| 358 | Exploratory Dataset | Clinical Research and Regulatory Affairs 2010;27:87-95     |
| 359 | Exploratory Dataset | J Clin Psychiatry 2008 Jan;69(1):149-59                    |
| 360 | Exploratory Dataset | J Crohns Colitis 2012 Mar;6(2):160-73                      |
| 361 | Exploratory Dataset | Mod Rheumatol 2013 Jul;23(4):623-33                        |
| 362 | Exploratory Dataset | J Clin Oncol 2012 Sep 1;30(25):3084-92                     |
| 363 | Exploratory Dataset | Osteoarthritis Cartilage, 2012, 20: 350-356                |
| 364 | Exploratory Dataset | Diabetes Obes Metab 2010 Mar;12(3):252-61                  |
| 365 | Exploratory Dataset | Ann Oncol 2015 Feb;26(2):325-32                            |
| 366 | Exploratory Dataset | Nutr J, 2008, 7: 9                                         |
| 367 | Exploratory Dataset | Clinical Research and Regulatory Affairs 2011;28(1): 14-21 |
| 368 | Exploratory Dataset | Lancet 2010 Mar 6;375(9717):807-15                         |
| 369 | Exploratory Dataset | Allergy Asthma Proc Mar-Apr 2011;32(2):127-36              |
| 370 | Exploratory Dataset | Invest New Drugs 2013 Oct;31(5):1345-54                    |
| 371 | Exploratory Dataset | J Clin Oncol 2012 Apr 1;30(10):1122-8                      |
| 372 | Exploratory Dataset | Ann Oncol 2014 Feb;25(2):409-15                            |
| 373 | Exploratory Dataset | J Clin Oncol 2012 Jun 10;30(17):2070-8                     |
| 374 | Exploratory Dataset | J Clin Oncol 2013 Apr 1;31(10):1341-7                      |
| 375 | Exploratory Dataset | Lancet Oncol 2013 Jul;14(8):697-710                        |
| 376 | Exploratory Dataset | J Clin Oncol 2012 Aug 10;30(23):2829-36                    |
| 377 | Exploratory Dataset | J Thorac Oncol, 2014, 9: 1154-61                           |
| 378 | Exploratory Dataset | J Clin Oncol 2013 Jul 10;31(20):2586-92                    |
| 379 | Exploratory Dataset | Clin Ther 2009 Jan;31(1):177-89                            |
| 380 | Exploratory Dataset | Epilepsia, 2014, 55: 57-66                                 |

|     |                     |                                                    |
|-----|---------------------|----------------------------------------------------|
| 381 | Exploratory Dataset | J Cancer Res Clin Oncol 2013 Dec;139(12):2047-56   |
| 382 | Exploratory Dataset | Lancet Oncol 2011 Mar;12(3):256-62                 |
| 383 | Exploratory Dataset | J Clin Oncol 2014 Mar 10;32(8):760-7               |
| 384 | Exploratory Dataset | Clin Cancer Res 2010 Feb 15;16(4):1307-14          |
| 385 | Exploratory Dataset | J Shoulder Elbow Surg, 2013, 22: 584-94            |
| 386 | Exploratory Dataset | Int J Clin Pract 2009 Apr;63(4):547-59             |
| 387 | Exploratory Dataset | Diabetes Obes Metab 2011 Jul;13(7):644-52          |
| 388 | Exploratory Dataset | Lancet Oncol, 2013, 14: 1077-1085                  |
| 389 | Exploratory Dataset | Lancet Oncol 2013 Nov;14(12):1183-92               |
| 390 | Exploratory Dataset | Haematologica, 2014, 99: 1343-9                    |
| 391 | Exploratory Dataset | Gastroenterology 2014 Jan;146(1):85-95; quiz e14-5 |
| 392 | Exploratory Dataset | Gastroenterology 2014 Jan;146(1):96-109e1          |
| 393 | Exploratory Dataset | Aliment Pharmacol Ther 2015 Sep;42(5):504-14       |
| 394 | Exploratory Dataset | Epilepsia, 2014, 55: 47-56                         |
| 395 | Exploratory Dataset | J Clin Oncol 2016 Apr 1;34(10):1034-42             |
| 396 | Exploratory Dataset | Mol Autism 2012 Dec 5;3(1):16                      |
| 397 | Exploratory Dataset | Arch Gen Psychiatry 2011 Dec;68(12):1195-206       |
| 398 | Exploratory Dataset | Lancet Oncol 2009 Jan;10(1):25-34                  |
| 399 | Exploratory Dataset | Clin Cancer Res 2013 May 15;19(10):2745-54         |
| 400 | Exploratory Dataset | Ann Oncol 2012 Apr;23(4):933-41                    |
| 401 | Exploratory Dataset | Eur J Cancer 2011 Sep;47(14):2117-27               |
| 402 | Exploratory Dataset | Drug Saf 2009;32(9):787-800                        |
| 403 | Exploratory Dataset | Circ J 2013;77(3):632-8                            |
| 404 | Exploratory Dataset | Circ J 2012;76(9):2104-11                          |

|     |                     |                                                         |
|-----|---------------------|---------------------------------------------------------|
| 405 | Exploratory Dataset | Diabetes Obes Metab 2015 Jan;17(1):98-101               |
| 406 | Exploratory Dataset | N Engl J Med 2011 Mar 3;364(9):806-17                   |
| 407 | Exploratory Dataset | J Clin Oncol 2013 May 1;31(13):1640-8                   |
| 408 | Exploratory Dataset | Gastroenterology 2016 Feb;150(2):380-8e4                |
| 409 | Exploratory Dataset | Cancer Biother Radiopharm 2009 Apr;24(2):175-80         |
| 410 | Exploratory Dataset | Child Adolesc Psychiatry Ment Health 2009 Jun 9;3(1):17 |
| 411 | Exploratory Dataset | Lancet Oncol 2015 Feb;16(2):208-20                      |
| 412 | Exploratory Dataset | Epilepsia, 2014, 55: 38-46                              |
| 413 | Exploratory Dataset | JAMA Psychiatry 2013 May;70(5):522-33                   |
| 414 | Exploratory Dataset | J Hepatol 2012 May;56(5):1097-1103                      |
| 415 | Exploratory Dataset | Am J Kidney Dis 2013 Apr;61(4):579-87                   |
| 416 | Exploratory Dataset | Diabetes Care 2013 May;36(5):1067-73                    |
| 417 | Exploratory Dataset | N Engl J Med 2011 Feb 10;364(6):514-23                  |
| 418 | Exploratory Dataset | Diabetes Care 2013 May;36(5):1304-11                    |
| 419 | Exploratory Dataset | Palliat Med, 2012, 26: 50-60                            |
| 420 | Exploratory Dataset | Cancer Chemother Pharmacol 2012 May;69(5):1197-204      |
| 421 | Exploratory Dataset | Gastroenterology 2014 Feb;146(2):442-52e1               |
| 422 | Exploratory Dataset | Eur J Cancer 2013 Sep;49(13):2823-31                    |
| 423 | Exploratory Dataset | Lancet Oncol, 2013, 14: 760-8                           |
| 424 | Exploratory Dataset | J Asthma 2016 Oct;53(8):783-9                           |
| 425 | Exploratory Dataset | Congest Heart Fail May-Jun 2010;16(3):111-7             |
| 426 | Exploratory Dataset | J Clin Oncol 2012 Jun 10;30(17):2046-54                 |
| 427 | Exploratory Dataset | Diabetes Care 2010 Oct;33(10):2217-24                   |
| 428 | Exploratory Dataset | Lancet Oncol, 2013, 14: 933-42                          |



|     |                     |                                              |
|-----|---------------------|----------------------------------------------|
| 429 | Exploratory Dataset | BMC Med 2013 Feb 20;11:43                    |
| 430 | Exploratory Dataset | Ann Rheum Dis, 2012, 71: 198-205             |
| 431 | Exploratory Dataset | J Clin Oncol, 2012, 30: 3640-7               |
| 432 | Exploratory Dataset | Lancet Oncol 2015 Feb;16(2):187-99           |
| 433 | Exploratory Dataset | Am J Cardiol 2010 Nov 1;106(9):1255-63       |
| 434 | Exploratory Dataset | Ann Rheum Dis, 2015, 74: 694-702             |
| 435 | Exploratory Dataset | Lancet Oncol 2008 Jan;9(1):39-44             |
| 436 | Exploratory Dataset | Lancet Oncol 2012 Sep;13(9):897-905          |
| 437 | Exploratory Dataset | J Clin Oncol 2013 Jul 1;31(19):2485-92       |
| 438 | Exploratory Dataset | J Thromb Haemost 2012 May;10(5):799-806      |
| 439 | Exploratory Dataset | Ann Oncol 2012 Nov;23(11):2799-2805          |
| 440 | Exploratory Dataset | Rheumatology (Oxford) 2012 Jul;51(7):1226-34 |
| 441 | Exploratory Dataset | Lancet Oncol 2012 Jan;13(1):25-32            |
| 442 | Exploratory Dataset | Lancet Oncol 2015 Feb;16(2):221-32           |
| 443 | Exploratory Dataset | J Clin Oncol, 2011, 29: 3968-76              |
| 444 | Exploratory Dataset | Ann Rheum Dis 2009 Jun;68(6):805-11          |
| 445 | Exploratory Dataset | Eur J Cancer 2013 Oct;49(15):3111-21         |
| 446 | Exploratory Dataset | Arthritis Rheum 2012 Mar;64(3):617-29        |
| 447 | Exploratory Dataset | Lancet Oncol 2014 Jul;15(8):819-28           |
| 448 | Exploratory Dataset | Lancet 2012 Feb 18;379(9816):633-40          |
| 449 | Exploratory Dataset | J Natl Cancer Inst 2014 Jul 16;106(7):dju151 |
| 450 | Exploratory Dataset | Lancet Oncol, 2010, 11: 521-9                |
| 451 | Exploratory Dataset | J Clin Oncol, 2012, 30: 3499-506             |
| 452 | Exploratory Dataset | Ann Oncol 2017 Oct 1;28(10):2429-2435        |

|     |                     |                                          |
|-----|---------------------|------------------------------------------|
| 453 | Exploratory Dataset | Inflamm Bowel Dis 2015 Jun;21(6):1329-40 |
| 454 | Exploratory Dataset | Lancet 2013 Mar 16;381(9870):918-29      |
| 455 | Exploratory Dataset | N Engl J Med 2015 Feb 19;372(8):724-34   |
| 456 | Exploratory Dataset | N Engl J Med 2012 Jan 12;366(2):109-19   |
| 457 | Exploratory Dataset | Am J Addict Sep-Oct 2010;19(5):401-8     |
| 458 | Exploratory Dataset | N Engl J Med, 2012, 366: 299-309         |
| 459 | Exploratory Dataset | Ann Surg Oncol, 2014, 21: 2517-24        |
| 460 | Exploratory Dataset | Lancet Oncol 2012;13:135-44              |
| 461 | Exploratory Dataset | Eur Respir J 2011 Feb;37(2):273-9        |
| 462 | Exploratory Dataset | J Crohns Colitis 2013 Apr;7(3):239-47    |
| 463 | Exploratory Dataset | Eur J Cancer, 2013, 49: 2633-42          |
| 464 | Exploratory Dataset | Int J Clin Pract 2013 Apr;67(4):307-16   |
| 465 | Exploratory Dataset | J Diabetes Investig, 2011, 2: 210-7      |
| 466 | Exploratory Dataset | Clin Ther 2011 Apr;33(4):465-77          |
| 467 | Exploratory Dataset | Arthritis Rheum 2011 Jul;63(7):1782-92   |
| 468 | Exploratory Dataset | J Clin Oncol 2011 Jun 20;29(18):2582-9   |
| 469 | Exploratory Dataset | Diabetes Obes Metab 2011 Jan;13(1):65-74 |
| 470 | Exploratory Dataset | Diabet Med 2011 Nov;28(11):1352-61       |
| 471 | Exploratory Dataset | Ann Rheum Dis, 2011, 70: 982-9           |
| 472 | Exploratory Dataset | BMC Cancer 2012 Sep 24;12:423            |
| 473 | Exploratory Dataset | Circulation, 2013, 127: 96-103           |
| 474 | Exploratory Dataset | Arthritis Rheum 2012 Mar;64(3):876-84    |
| 475 | Exploratory Dataset | Intensive Care Med, 2012, 38: 1118-25    |
| 476 | Exploratory Dataset | Cancer 2017 Jan 1;123(2):303-311         |

|     |                     |                                                     |
|-----|---------------------|-----------------------------------------------------|
| 477 | Exploratory Dataset | Cancer 2014 Jun 15;120(12):1838-46                  |
| 478 | Exploratory Dataset | Int J Clin Pract, 2011, 65: 1230-9                  |
| 479 | Exploratory Dataset | Clin Gastroenterol Hepatol 2014 Sep;12(9):1485-93e2 |
| 480 | Exploratory Dataset | Diabetes Obes Metab 2011 Mar;13(3):258-67           |
| 481 | Exploratory Dataset | JAMA 2014 Jan 8;311(2):145-54                       |
| 482 | Exploratory Dataset | J Diabetes Investig 2014 Jul;5(4):382-91            |
| 483 | Exploratory Dataset | Lancet 2012 Aug 4;380(9840):475-83                  |
| 484 | Exploratory Dataset | BMC Pulm Med 2010 Mar 8;10:11                       |
| 485 | Exploratory Dataset | Diabetes Obes Metab 2013 Sep;15(9):810-8            |
| 486 | Exploratory Dataset | J Clin Oncol 2012 Feb 1;30(4):372-9                 |
| 487 | Exploratory Dataset | N Engl J Med 2010 Feb 11;362(6):504-12              |
| 488 | Exploratory Dataset | BMC Pulm Med 2011 Nov 15;11:51                      |
| 489 | Exploratory Dataset | Inflamm Bowel Dis 2010 Oct;16(10):1708-16           |
| 490 | Exploratory Dataset | J Clin Oncol 2014 Mar 10;32(8):752-9                |
| 491 | Exploratory Dataset | Clin Breast Cancer 2015 Feb;15(1):8-15              |
| 492 | Exploratory Dataset | N Engl J Med 2016 Nov 10;375(19):1845-1855          |
| 493 | Exploratory Dataset | Lancet Oncol, 2015, 16: 522-30                      |
| 494 | Exploratory Dataset | Am J Respir Crit Care Med 2014 Jul 15;190(2):208-17 |
| 495 | Exploratory Dataset | Lancet 2010 Aug 7;376(9739):431-9                   |
| 496 | Exploratory Dataset | N Engl J Med, 2011, 364: 1995-2005                  |
| 497 | Exploratory Dataset | J Clin Oncol 2013 Jul 1;31(19):2477-84              |
| 498 | Exploratory Dataset | Lancet Diabetes Endocrinol 2014 Jun;2(6):464-73     |
| 499 | Exploratory Dataset | Diabetes Care, 2012, 35: 683-9                      |
| 500 | Exploratory Dataset | Diabetes Care 2012 Jun;35(6):1232-8                 |

|     |                     |                                                          |
|-----|---------------------|----------------------------------------------------------|
| 501 | Exploratory Dataset | N Engl J Med 2012 Dec 20;367(25):2385-95                 |
| 502 | Exploratory Dataset | Chin J Cancer, 2011, 30: 682-9                           |
| 503 | Exploratory Dataset | N Engl J Med 2013 Aug 29;369(9):799-808                  |
| 504 | Exploratory Dataset | Int J Clin Pract 2012 May;66(5):446-56                   |
| 505 | Exploratory Dataset | J Clin Psychiatry 2012 May;73(5):654-60                  |
| 506 | Exploratory Dataset | Cancer 2014 Sep 1;120(17):2684-93                        |
| 507 | Exploratory Dataset | Ann Allergy Asthma Immunol 2009 Jul;103(1):62-72         |
| 508 | Exploratory Dataset | Allergy Asthma Proc Jan-Feb 2010;31(1):26-39             |
| 509 | Exploratory Dataset | Current Medical Research and Opinion 2013;29(10):1357-69 |
| 510 | Exploratory Dataset | Allergy Asthma Proc Jan-Feb 2010;31(1):49-59             |
| 511 | Exploratory Dataset | Diabetes Obes Metab 2013 Apr;15(4):364-71                |
| 512 | Exploratory Dataset | Clin Gastroenterol Hepatol 2008 Dec;6(12):1370-7         |
| 513 | Exploratory Dataset | JAMA Oncol 2017 Nov 1;3(11):1520-1528                    |
| 514 | Exploratory Dataset | Lancet Oncol, 2012, 13: 528-38                           |
| 515 | Exploratory Dataset | Gut 2014 Mar;63(3):442-50                                |
| 516 | Exploratory Dataset | Thromb Haemost 2011 Apr;105(4):721-9                     |
| 517 | Exploratory Dataset | J Allergy Clin Immunol, 2013, 132: 1086-1096e5           |
| 518 | Exploratory Dataset | N Engl J Med 2013 Aug 29;369(9):809-18                   |
| 519 | Exploratory Dataset | Diabetes Care 2011 Sep;34(9):2015-22                     |
| 520 | Exploratory Dataset | Diabetes Res Clin Pract 2011 Nov;94(2):217-24            |
| 521 | Exploratory Dataset | Clin Genitourin Cancer 2012 Mar;10(1):6-14               |
| 522 | Exploratory Dataset | Kidney Int 2014 Apr;85(4):962-71                         |
| 523 | Exploratory Dataset | Sci Transl Med 2010 Oct 6;2(52):52ra72                   |
| 524 | Exploratory Dataset | Diabetes Obes Metab 2014 Feb;16(2):124-36                |

|     |                     |                                              |
|-----|---------------------|----------------------------------------------|
| 525 | Exploratory Dataset | Ann Rheum Dis 2015 May;74(5):843-50          |
| 526 | Exploratory Dataset | Diabetes Care 2012 Feb;35(2):252-8           |
| 527 | Exploratory Dataset | J Clin Oncol 2014 Jan 10;32(2):76-82         |
| 528 | Exploratory Dataset | Chest 2011 Jul;140(1):68-75                  |
| 529 | Exploratory Dataset | N Engl J Med 2012 Aug 23;367(8):716-24       |
| 530 | Exploratory Dataset | Gut 2014 Mar;63(3):433-41                    |
| 531 | Exploratory Dataset | Gastroenterology 2012 Nov;143(5):1218-1226e2 |
| 532 | Exploratory Dataset | N Engl J Med 2011 Oct 27;365(17):1586-96     |
| 533 | Exploratory Dataset | Circulation 2014 Feb 18;129(7):764-72        |
| 534 | Exploratory Dataset | Diabetes Ther 2014 Jun;5(1):267-83           |
| 535 | Exploratory Dataset | PLoS One 2012;7(1):e30123                    |
| 536 | Exploratory Dataset | Diabetes Care 2012 Jul;35(7):1473-8          |
| 537 | Exploratory Dataset | Clin Ther, 2013, 35: 431-9                   |
| 538 | Exploratory Dataset | Mod Rheumatol, 2015, 25: 514-21              |
| 539 | Exploratory Dataset | Nicotine Tob Res 2012 Mar;14(3):343-50       |
| 540 | Exploratory Dataset | Br J Dermatol, 2011, 165: 652-60             |
| 541 | Exploratory Dataset | Lancet Oncol 2015 Oct;16(13):1344-54         |
| 542 | Exploratory Dataset | J Thorac Oncol 2017 May;12(5):843-849        |
| 543 | Exploratory Dataset | Schizophr Res 2014;152(2-3):450-7            |
| 544 | Exploratory Dataset | Gut 2013 Aug;62(8):1122-30                   |
| 545 | Exploratory Dataset | Diabetes Metab Res Rev 2012 Mar;28(3):268-75 |
| 546 | Exploratory Dataset | Lancet Oncol, 2013, 14: 29-37                |
| 547 | Exploratory Dataset | Int J Clin Pract, 2011, 65: 397-407          |
| 548 | Exploratory Dataset | Diabetes Obes Metab 2011 Feb;13(2):160-8     |

|     |                     |                                                           |
|-----|---------------------|-----------------------------------------------------------|
| 549 | Exploratory Dataset | J Asthma 2012 Feb;49(1):70-7                              |
| 550 | Exploratory Dataset | J Am Coll Cardiol, 2013, 62: 909-17                       |
| 551 | Exploratory Dataset | J Clin Oncol 2015 Jan 10;33(2):141-8                      |
| 552 | Exploratory Dataset | J Clin Oncol 2013 Oct 10;31(29):3639-46                   |
| 553 | Exploratory Dataset | Br J Psychiatry 2014 Aug;205(2):135-44                    |
| 554 | Exploratory Dataset | Br J Dermatol, 2011, 165: 661-8                           |
| 555 | Exploratory Dataset | J Diabetes Complications May-Jun 2014;28(3):386-92        |
| 556 | Exploratory Dataset | J Clin Oncol, 2015, 33: 433-41                            |
| 557 | Exploratory Dataset | Rheumatology (Oxford) 2013 Jul;52(7):1303-12              |
| 558 | Exploratory Dataset | BMJ 2010 Dec 6;341:c6549                                  |
| 559 | Exploratory Dataset | Rheumatology (Oxford) 2012 Dec;51(12):2204-14             |
| 560 | Exploratory Dataset | Ann Rheum Dis 2014 Sep;73(9):1616-25                      |
| 561 | Exploratory Dataset | Lancet Oncol 2014 Aug;15(9):1007-18                       |
| 562 | Exploratory Dataset | Breast Cancer Res Treat 2020 Sep;183(2):419-428           |
| 563 | Exploratory Dataset | Cancer Chemother Pharmacol 2015 Mar;75(3):569-77          |
| 564 | Exploratory Dataset | Diabetes Obes Metab 2014 Mar;16(3):223-30                 |
| 565 | Exploratory Dataset | J Clin Psychopharmacol 2013 Apr;33(2):243-7               |
| 566 | Exploratory Dataset | Ann Rheum Dis 2012 Jun;71(6):817-24                       |
| 567 | Exploratory Dataset | Diabetes Obes Metab, 2015, 17: 849-58                     |
| 568 | Exploratory Dataset | J Am Acad Child Adolesc Psychiatry 2011 Apr;50(4):395-405 |
| 569 | Exploratory Dataset | Gut 2015 Aug;64(8):1227-35                                |
| 570 | Exploratory Dataset | Diabetes Obes Metab 2012 Dec;14(12):1145-54               |
| 571 | Exploratory Dataset | Aliment Pharmacol Ther 2010 Oct;32(8):990-9               |
| 572 | Exploratory Dataset | Diabetes Obes Metab 2013 Dec;15(12):1154-60               |

|     |                     |                                                  |
|-----|---------------------|--------------------------------------------------|
| 573 | Exploratory Dataset | Biol Psychiatry 2011 Jun 1;69(11):1075-82        |
| 574 | Exploratory Dataset | Lancet 2012 Jun 16;379(9833):2262-9              |
| 575 | Exploratory Dataset | Eur J Cancer 2015 Mar;51(4):522-532              |
| 576 | Exploratory Dataset | Lancet Oncol 2014 Jul;15(8):852-61               |
| 577 | Exploratory Dataset | Ann Oncol 2015 Mar;26(3):542-7                   |
| 578 | Exploratory Dataset | Jpn J Clin Oncol 2016 Mar;46(3):248-53           |
| 579 | Exploratory Dataset | Lancet 2012 May 19;379(9829):1879-86             |
| 580 | Exploratory Dataset | Clin Drug Investig 2013 Oct;33(10):707-17        |
| 581 | Exploratory Dataset | Curr Med Res Opin 2012 Apr;28(4):513-23          |
| 582 | Exploratory Dataset | Diabetes Obes Metab 2013 Nov;15(11):1000-7       |
| 583 | Exploratory Dataset | Eur Neuropsychopharmacol 2013 Oct;23(10):1208-18 |
| 584 | Exploratory Dataset | Ann Intern Med 2011 Jan 18;154(2):103-12         |
| 585 | Exploratory Dataset | Am J Emerg Med, 2015, 33: 14-20                  |
| 586 | Exploratory Dataset | Ann Intern Med 2013 May 7;158(9):641-9           |
| 587 | Exploratory Dataset | BMC Cancer 2014 Apr 25;14:290                    |
| 588 | Exploratory Dataset | Lancet Oncol, 2012, 13: 466-75                   |
| 589 | Exploratory Dataset | N Engl J Med 2012 Oct 18;367(16):1519-28         |
| 590 | Exploratory Dataset | Eur J Cancer 2013 Dec;49(18):3763-72             |
| 591 | Exploratory Dataset | J Clin Oncol 2013 Sep 10;31(26):3212-8           |
| 592 | Exploratory Dataset | Lung Cancer 2013 Dec;82(3):455-60                |
| 593 | Exploratory Dataset | J Clin Oncol, 2011, 29: 3307-15                  |
| 594 | Exploratory Dataset | N Engl J Med 2013 Nov 28;369(22):2093-104        |
| 595 | Exploratory Dataset | Lipids Health Dis 2012 Jan 31;11:18              |
| 596 | Exploratory Dataset | Am J Cardiol 2011 Aug 15;108(4):523-30           |

|     |                     |                                                      |
|-----|---------------------|------------------------------------------------------|
| 597 | Exploratory Dataset | N Engl J Med 2013; 369:711-721                       |
| 598 | Exploratory Dataset | N Engl J Med 2013 Aug 22;369(8):699-710              |
| 599 | Exploratory Dataset | BMC Musculoskelet Disord 2011 Jul 7;12:153           |
| 600 | Exploratory Dataset | N Engl J Med 2012; 367:616-624                       |
| 601 | Exploratory Dataset | Clin Cancer Res 2014 Aug 15;20(16):4240-50           |
| 602 | Exploratory Dataset | Diabetes Obes Metab 2013 Aug;15(8):721-8             |
| 603 | Exploratory Dataset | Clin Ther 2012 Mar;34(3):580-92                      |
| 604 | Exploratory Dataset | Lancet 2013 Jan 12;381(9861):125-32                  |
| 605 | Exploratory Dataset | N Engl J Med 2015 Jul 16;373(3):232-42               |
| 606 | Exploratory Dataset | Lancet 2013 Mar 9;381(9869):817-24                   |
| 607 | Exploratory Dataset | Drug Alcohol Depend 2013 Dec 1;133(2):486-93         |
| 608 | Exploratory Dataset | Gynecol Oncol 2013 Jul;130(1):25-30                  |
| 609 | Exploratory Dataset | Mod Rheumatol 2014 Jul;24(4):552-60                  |
| 610 | Exploratory Dataset | Mod Rheumatol 2014 Sep;24(5):715-24                  |
| 611 | Exploratory Dataset | Int J Chron Obstruct Pulmon Dis 2014 Jul 5;9:697-714 |
| 612 | Exploratory Dataset | Eur J Cancer 2014 Mar;50(4):706-12                   |
| 613 | Exploratory Dataset | Diabetes Obes Metab 2012 Jun;14(6):565-74            |
| 614 | Exploratory Dataset | Diabetes Obes Metab 2015 Oct;17(10):984-93           |
| 615 | Exploratory Dataset | N Engl J Med, 2014, 370: 734-43                      |
| 616 | Exploratory Dataset | Ann Oncol 2015 Oct;26(10):2173-9                     |
| 617 | Exploratory Dataset | Lancet Oncol 2014 Feb;15(2):143-55                   |
| 618 | Exploratory Dataset | Exp Dermatol 2015 Jul;24(7):529-35                   |
| 619 | Exploratory Dataset | Lancet 2013 Nov 23;382(9906):1705-13                 |
| 620 | Exploratory Dataset | Ann Rheum Dis 2014 Feb;73(2):349-56                  |



|     |                     |                                                      |
|-----|---------------------|------------------------------------------------------|
| 621 | Exploratory Dataset | Ann Rheum Dis 2013 Jan;72(1):43-50                   |
| 622 | Exploratory Dataset | Biol Psychiatry 2013 Apr 15;73(8):706-13             |
| 623 | Exploratory Dataset | Alcohol Alcohol Sep-Oct 2013;48(5):570-8             |
| 624 | Exploratory Dataset | J Diabetes 2012 Sep;4(3):227-37                      |
| 625 | Exploratory Dataset | Neurology 2016 Jul 5;87(1):57-64                     |
| 626 | Exploratory Dataset | N Engl J Med, 2012, 367: 495-507                     |
| 627 | Exploratory Dataset | Clin Ther 2012 Sep;34(9):1909-19e15                  |
| 628 | Exploratory Dataset | J Clin Oncol 2014 Jul 20;32(21):2240-7               |
| 629 | Exploratory Dataset | J Clin Oncol 2010 Sep 1;28(25):3945-50               |
| 630 | Exploratory Dataset | Lancet Oncol 2013 May;14(6):481-9                    |
| 631 | Exploratory Dataset | J Clin Oncol, 2013, 31: 3509-16                      |
| 632 | Exploratory Dataset | JAMA Surg, 2015, 150: 730-7                          |
| 633 | Exploratory Dataset | J Clin Oncol, 2014, 32: 2463-70                      |
| 634 | Exploratory Dataset | N Engl J Med 2012; 367:1783-1791                     |
| 635 | Exploratory Dataset | Arthritis Care Res (Hoboken) 2012 Oct;64(10):1462-70 |
| 636 | Exploratory Dataset | JAMA Psychiatry 2015 May;72(5):430-7                 |
| 637 | Exploratory Dataset | N Engl J Med 2011 Aug 25;365(8):699-708              |
| 638 | Exploratory Dataset | Lancet Oncol 2013 Nov;14(12):1233-42                 |
| 639 | Exploratory Dataset | Diabetes Care 2014 Aug;37(8):2141-8                  |
| 640 | Exploratory Dataset | Diabetologia 2014 Dec;57(12):2475-84                 |
| 641 | Exploratory Dataset | Diabetes Obes Metab 2015 Feb;17(2):179-87            |
| 642 | Exploratory Dataset | Ann Rheum Dis 2014 Jan;73(1):101-7                   |
| 643 | Exploratory Dataset | Arthritis Rheum 2013 Mar;65(3):559-70                |
| 644 | Exploratory Dataset | Diabetologia, 2016, 59: 266-74                       |

|     |                     |                                             |
|-----|---------------------|---------------------------------------------|
| 645 | Exploratory Dataset | Diabetes Obes Metab 2014 Dec;16(12):1257-64 |
| 646 | Exploratory Dataset | N Engl J Med 2012 Aug 9;367(6):508-19       |
| 647 | Exploratory Dataset | J Clin Oncol 2013 Nov 10;31(32):4105-14     |
| 648 | Exploratory Dataset | Diabetes Obes Metab 2014 Feb;16(2):159-69   |
| 649 | Exploratory Dataset | J Hepatol 2016 May;64(5):1090-1098          |
| 650 | Exploratory Dataset | J Diabetes Complications, 2015, 29: 1287-94 |
| 651 | Exploratory Dataset | J Rheumatol 2014 Aug;41(8):1703-11          |
| 652 | Exploratory Dataset | Diabetes Obes Metab 2014 Dec;16(12):1239-46 |
| 653 | Exploratory Dataset | Ann Intern Med 2013 Aug 20;159(4):253-61    |
| 654 | Exploratory Dataset | Lancet Oncol 2014 Jun;15(7):700-12          |
| 655 | Exploratory Dataset | Clin Breast Cancer 2013 Dec;13(6):421-432e8 |
| 656 | Exploratory Dataset | J Clin Oncol 2012 Aug 1;30(22):2718-24      |
| 657 | Exploratory Dataset | Adv Ther 2013 Oct;30(10):870-84             |
| 658 | Exploratory Dataset | N Engl J Med 2012 Feb 9;366(6):520-9        |
| 659 | Exploratory Dataset | J Thorac Oncol 2015 Dec;10(12):1745-53      |
| 660 | Exploratory Dataset | Clin Cancer Res 2013 May 1;19(9):2541-50    |
| 661 | Exploratory Dataset | J Clin Oncol 2014 Oct 20;32(30):3374-82     |
| 662 | Exploratory Dataset | Ann Rheum Dis 2014 Mar;73(3):536-43         |
| 663 | Exploratory Dataset | Lancet Oncol 2015 Jul;16(7):816-29          |
| 664 | Exploratory Dataset | Blood 2014 May 8;123(19):2944-52            |
| 665 | Exploratory Dataset | Lancet Oncol, 2016, 17: 367-377             |
| 666 | Exploratory Dataset | J Clin Oncol 2013 Nov 1;31(31):3935-43      |
| 667 | Exploratory Dataset | Diabetes Care, 2013, 36: 4015-21            |
| 668 | Exploratory Dataset | N Engl J Med, 2014, 370: 699-708            |

|     |                     |                                                        |
|-----|---------------------|--------------------------------------------------------|
| 669 | Exploratory Dataset | J Diabetes Complications Mar-Apr 2013;27(2):177-83     |
| 670 | Exploratory Dataset | N Engl J Med, 2013, 368: 138-48                        |
| 671 | Exploratory Dataset | Gastric Cancer, 2015, 18: 168-76                       |
| 672 | Exploratory Dataset | Lancet Oncol, 2013, 14: 38-47                          |
| 673 | Exploratory Dataset | Lancet Oncol 2015 Dec;16(16):1691-9                    |
| 674 | Exploratory Dataset | Eur Respir J 2013 Dec;42(6):1622-32                    |
| 675 | Exploratory Dataset | J Child Adolesc Psychopharmacol 2013 Feb;23(1):3-10    |
| 676 | Exploratory Dataset | Hepatology, 2014, 60: 1697-707                         |
| 677 | Exploratory Dataset | Lancet, 2014, 383: 31-39                               |
| 678 | Exploratory Dataset | Respir Med 2008 May;102(5):665-73                      |
| 679 | Exploratory Dataset | Alcohol Clin Exp Res 2018 Apr;42(4):751-760            |
| 680 | Exploratory Dataset | J Child Adolesc Psychopharmacol 2014 May;24(4):190-200 |
| 681 | Exploratory Dataset | Ann Rheum Dis 2013 Jun;72(6):863-9                     |
| 682 | Exploratory Dataset | J Rheumatol 2014 Mar;41(3):414-21                      |
| 683 | Exploratory Dataset | Gut 2011 Aug;60(8):1068-75                             |
| 684 | Exploratory Dataset | J Psychiatr Res, 2012, 46: 574-81                      |
| 685 | Exploratory Dataset | Clin Ther 2012 Sep;34(9):1892-908e1                    |
| 686 | Exploratory Dataset | Lancet Oncol, 2013, 14: 733-40                         |
| 687 | Exploratory Dataset | Alcohol Clin Exp Res 2017 Jun;41(6):1201-1211          |
| 688 | Exploratory Dataset | Ann Rheum Dis 2013 Jun;72(6):815-22                    |
| 689 | Exploratory Dataset | Lancet Oncol 2015 Aug;16(8):967-78                     |
| 690 | Exploratory Dataset | Br J Dermatol 2013 Feb;168(2):402-11                   |
| 691 | Exploratory Dataset | Thromb Res 2012 Sep;130(3):e52-9                       |
| 692 | Exploratory Dataset | N Engl J Med, 2014, 370: 709-22                        |

|     |                     |                                               |
|-----|---------------------|-----------------------------------------------|
| 693 | Exploratory Dataset | J Clin Oncol, 2017, 35: 48-55                 |
| 694 | Exploratory Dataset | J Rheumatol 2015 Jun;42(6):912-9              |
| 695 | Exploratory Dataset | AIDS 2013 Jul 17;27(11):1771-8                |
| 696 | Exploratory Dataset | Diabetes Care 2013 Dec;36(12):3875-81         |
| 697 | Exploratory Dataset | Rheumatology (Oxford) 2013 Jul;52(7):1285-92  |
| 698 | Exploratory Dataset | Lancet 2013 Feb 9;381(9865):451-60            |
| 699 | Exploratory Dataset | Diabetes Care 2014 Oct;37(10):2763-73         |
| 700 | Exploratory Dataset | J Clin Oncol 2013 Aug 20;31(24):3004-11       |
| 701 | Exploratory Dataset | Arthritis Rheumatol 2014 Jul;66(7):1693-704   |
| 702 | Exploratory Dataset | Eur J Cancer 2013 Nov;49(17):3609-15          |
| 703 | Exploratory Dataset | N Engl J Med 2013 Oct 3;369(14):1327-35       |
| 704 | Exploratory Dataset | Diabetes Care, 2015, 38: 355-64               |
| 705 | Exploratory Dataset | Lancet 2013 Sep 14;382(9896):941-50           |
| 706 | Exploratory Dataset | Postgrad Med 2016 May;128(4):371-80           |
| 707 | Exploratory Dataset | J Clin Oncol 2013 Sep 10;31(26):3219-25       |
| 708 | Exploratory Dataset | Diabetes Obes Metab 2013 May;15(5):432-40     |
| 709 | Exploratory Dataset | Ann Rheum Dis 2013 Mar;72(3):381-9            |
| 710 | Exploratory Dataset | N Engl J Med, 2012, 367: 1187-97              |
| 711 | Exploratory Dataset | Diabetes Care 2013 Sep;36(9):2489-96          |
| 712 | Exploratory Dataset | N Engl J Med 2012 Mar 29;366(13):1181-9       |
| 713 | Exploratory Dataset | Diabetes Care 2014 Aug;37(8):2317-25          |
| 714 | Exploratory Dataset | J Diabetes Complications, 2017, 31: 1283-1285 |
| 715 | Exploratory Dataset | Diabetes Obes Metab 2013 Sep;15(9):853-62     |
| 716 | Exploratory Dataset | J Clin Oncol, 2014, 32: 1302-8                |

|     |                     |                                            |
|-----|---------------------|--------------------------------------------|
| 717 | Exploratory Dataset | Nicotine Tob Res 2013 Feb;15(2):419-27     |
| 718 | Exploratory Dataset | Lancet 2014 Jul 26;384(9940):319-28        |
| 719 | Exploratory Dataset | BMC Cancer 2011 Aug 11;11:349              |
| 720 | Exploratory Dataset | Diabetes Care 2014;37(3):740-50            |
| 721 | Exploratory Dataset | Lancet Respir Med, 2014, 2: 361-8          |
| 722 | Exploratory Dataset | N Engl J Med 2013 Oct 10;369(15):1406-15   |
| 723 | Exploratory Dataset | Ann Rheum Dis 2015 Jun;74(6):1110-7        |
| 724 | Exploratory Dataset | Lancet Oncol 2013 Jan;14(1):55-63          |
| 725 | Exploratory Dataset | Lancet 2013 Apr 6;381(9873):1203-10        |
| 726 | Exploratory Dataset | Neurology 2012 Feb 21;78(8):545-50         |
| 727 | Exploratory Dataset | J Diabetes 2017 Apr;9(4):412-422           |
| 728 | Exploratory Dataset | J Rheumatol 2014 Apr;41(4):648-57          |
| 729 | Exploratory Dataset | Lancet Oncol, 2014, 15: 1379-88            |
| 730 | Exploratory Dataset | Malawi Med J 2016 Sep;28(3):123-130        |
| 731 | Exploratory Dataset | Br J Dermatol 2012;167:649-57              |
| 732 | Exploratory Dataset | Diabetes Obes Metab 2015 Jul;17(7):630-8   |
| 733 | Exploratory Dataset | Ann Rheum Dis, 2016, 75: 1081-91           |
| 734 | Exploratory Dataset | Ann Rheum Dis 2017 Jul;76(7):1279-1284     |
| 735 | Exploratory Dataset | Lancet Oncol 2014 May;15(6):580-91         |
| 736 | Exploratory Dataset | Gastroenterology 2015 Apr;148(4):740-750e2 |
| 737 | Exploratory Dataset | PLoS One, 2017, 12: e0182411               |
| 738 | Exploratory Dataset | Lancet 2013 Aug 31;382(9894):780-9         |
| 739 | Exploratory Dataset | Mol Cancer 2010 Mar 30;9:69                |
| 740 | Exploratory Dataset | Gut 2012 Dec;61(12):1693-700               |

|     |                     |                                                   |
|-----|---------------------|---------------------------------------------------|
| 741 | Exploratory Dataset | Eur Respir J, 2011, 37: 164-72                    |
| 742 | Exploratory Dataset | J Clin Psychiatry 2014 Jul;75(7):765-72           |
| 743 | Exploratory Dataset | Diabetes Obes Metab 2015 Oct;17(10):936-48        |
| 744 | Exploratory Dataset | Psychopharmacology (Berl) 2012 Oct;223(3):299-306 |
| 745 | Exploratory Dataset | Lancet Oncol, 2016, 17: 78-89                     |
| 746 | Exploratory Dataset | BMC Cancer 2016 Aug 31;16(1):699                  |
| 747 | Exploratory Dataset | Diabetes Obes Metab 2013 Dec;15(12):1136-45       |
| 748 | Exploratory Dataset | Diabetes Obes Metab 2014 Jul;16(7):613-21         |
| 749 | Exploratory Dataset | Diabetes Res Clin Pract 2014 Oct;106(1):50-6      |
| 750 | Exploratory Dataset | Addiction 2014 Sep;109(9):1554-63                 |
| 751 | Exploratory Dataset | Diabetes Care 2015 Jul;38(7):1218-27              |
| 752 | Exploratory Dataset | PLoS One 2013 Nov 11;8(11):e62264                 |
| 753 | Exploratory Dataset | Diabetes Care 2015 Mar;38(3):403-11               |
| 754 | Exploratory Dataset | N Engl J Med, 2017, 377: 644-657                  |
| 755 | Exploratory Dataset | Lancet, 2016, 388: 343-355                        |
| 756 | Exploratory Dataset | JAMA 2014 Jul 2;312(1):57-67                      |
| 757 | Exploratory Dataset | N Engl J Med 2016 Jul 7;375(1):23-34              |
| 758 | Exploratory Dataset | J Am Geriatr Soc 2014 Jul;62(7):1252-62           |
| 759 | Exploratory Dataset | Diabetes Obes Metab 2013 Aug;15(8):760-6          |
| 760 | Exploratory Dataset | Arthritis Rheumatol 2015 Feb;67(2):334-43         |
| 761 | Exploratory Dataset | Respir Med 2013 Apr;107(4):560-9                  |
| 762 | Exploratory Dataset | Diabetology International 2015; 6(1): 8-18        |
| 763 | Exploratory Dataset | J Clin Oncol 2017 Jan;35(1):40-47                 |
| 764 | Exploratory Dataset | J Affect Disord 2015;174:296–302                  |

|     |                     |                                                    |
|-----|---------------------|----------------------------------------------------|
| 765 | Exploratory Dataset | J Clin Psychiatry 2015;76(3):284–92                |
| 766 | Exploratory Dataset | Gastroenterology 2013 Jul;145(1):149-157e2         |
| 767 | Exploratory Dataset | Diabetes Obes Metab 2015 Jun;17(6):591-598         |
| 768 | Exploratory Dataset | Ann Rheum Dis 2015 Jun;74(6):1051-7                |
| 769 | Exploratory Dataset | Arthritis Rheumatol 2015 Jun;67(6):1424-37         |
| 770 | Exploratory Dataset | Ann Rheum Dis 2014 Sep;73(9):1626-34               |
| 771 | Exploratory Dataset | Ann Rheum Dis, 2014, 73: 376-84                    |
| 772 | Exploratory Dataset | J Clin Oncol 2015 Nov 20;33(33):3858-65            |
| 773 | Exploratory Dataset | Diabetes Obes Metab 2014 Oct;16(10):1016-27        |
| 774 | Exploratory Dataset | Clin Colorectal Cancer 2015 Sep;14(3):162-9        |
| 775 | Exploratory Dataset | Respirology 2013 Jul;18(5):866-73                  |
| 776 | Exploratory Dataset | Respir Res, 2013, 14: 125                          |
| 777 | Exploratory Dataset | Br J Dermatol 2013 Feb;168(2):412-21               |
| 778 | Exploratory Dataset | J Diabetes Complications May-Jun 2013;27(3):268-73 |
| 779 | Exploratory Dataset | N Engl J Med 2012 Nov 1;367(18):1694-703           |
| 780 | Exploratory Dataset | Int J Cancer 2016 Jul 1;139(1):177-86              |
| 781 | Exploratory Dataset | Ann Rheum Dis 2014 Jun;73(6):990-9                 |
| 782 | Exploratory Dataset | Ann Intern Med 2013 Sep 17;159(6):390-400          |
| 783 | Exploratory Dataset | Curr Med Res Opin 2014 Feb;30(2):163-75            |
| 784 | Exploratory Dataset | Diabetes Obes Metab 2013 Apr;15(4):372-82          |
| 785 | Exploratory Dataset | Lancet Oncol 2015 Jan;16(1):87-97                  |
| 786 | Exploratory Dataset | Diabetes Care 2015 Feb;38(2):e15-7                 |
| 787 | Exploratory Dataset | Ann Rheum Dis 2014 Jan;73(1):39-47                 |
| 788 | Exploratory Dataset | Ann Rheum Dis 2014 Jan;73(1):48-55                 |

|     |                     |                                               |
|-----|---------------------|-----------------------------------------------|
| 789 | Exploratory Dataset | Clin Lung Cancer 2015 Nov;16(6):447-56        |
| 790 | Exploratory Dataset | Clin Ther 2014 Jan 1;36(1):84-100e9           |
| 791 | Exploratory Dataset | J Diabetes 2016 Nov;8(6):796-808              |
| 792 | Exploratory Dataset | Diabetes Obes Metab 2015 Aug;17(8):805-8      |
| 793 | Exploratory Dataset | Diabetes Care, 2014, 37: 2723-30              |
| 794 | Exploratory Dataset | Diabetes Res Clin Pract 2015 Jul;109(1):141-8 |
| 795 | Exploratory Dataset | Lancet 2013 Jan 26;381(9863):303-12           |
| 796 | Exploratory Dataset | J Clin Psychiatry 2015;76(12):e1574-82        |
| 797 | Exploratory Dataset | J Clin Psychopharmacol 2015;35(4):367-73      |
| 798 | Exploratory Dataset | Int J Clin Pract 2013 Dec;67(12):1267-82      |
| 799 | Exploratory Dataset | Diabetes Obes Metab 2015 Mar;17(3):294-303    |
| 800 | Exploratory Dataset | Hosp Pract (1995), 2013, 41: 72-84            |
| 801 | Exploratory Dataset | Diabetologia 2013 Dec;56(12):2582-92          |
| 802 | Exploratory Dataset | Diabetes Obes Metab 2014 May;16(5):467-77     |
| 803 | Exploratory Dataset | N Engl J Med 2012 Mar 29;366(13):1190-9       |
| 804 | Exploratory Dataset | N Engl J Med 2013 Oct 3;369(14):1317-26       |
| 805 | Exploratory Dataset | Ann Rheum Dis 2014 Mar;73(3):587-94           |
| 806 | Exploratory Dataset | Diabetes Obes Metab 2013 May;15(5):403-9      |
| 807 | Exploratory Dataset | Lancet, 2013, 381: 1541-50                    |
| 808 | Exploratory Dataset | Diabetes Care, 2014, 37: 2168-76              |
| 809 | Exploratory Dataset | N Engl J Med 2015 Nov 26;373(22):2117-28      |
| 810 | Exploratory Dataset | Diabetes Obes Metab 2015 Mar;17(3):304-8      |
| 811 | Exploratory Dataset | Blood Press 2016;25(2):93-103                 |
| 812 | Exploratory Dataset | Diabetes Care 2013 Sep;36(9):2508-15          |



|     |                     |                                                                             |
|-----|---------------------|-----------------------------------------------------------------------------|
| 813 | Exploratory Dataset | Lancet Oncol, 2015, 16: 859-70                                              |
| 814 | Exploratory Dataset | JAMA, 2014, 311: 2397-405                                                   |
| 815 | Exploratory Dataset | N Engl J Med, 2017, 377: 1228-1239                                          |
| 816 | Exploratory Dataset | J Addict Med Jul-Aug 2013;7(4):277-86                                       |
| 817 | Exploratory Dataset | N Engl J Med 2015 Dec 3;373(23):2247-57 (作者仅给出非学术网页链接, 我们根据 Trial 名称找到对应文献) |
| 818 | Exploratory Dataset | J Intern Med, 2015, 277: 137-50                                             |
| 819 | Exploratory Dataset | Cancer Med 2015 Jan;4(1):16-26                                              |
| 820 | Exploratory Dataset | Diabet Med 2015 Dec;32(12):1555-67                                          |
| 821 | Exploratory Dataset | Eur J Cancer, 2015, 51: 1212-20                                             |
| 822 | Exploratory Dataset | Cancer 2015 Mar 15;121(6):883-92                                            |
| 823 | Exploratory Dataset | Ann Rheum Dis, 2015, 74: 818-22                                             |
| 824 | Exploratory Dataset | Lancet Diabetes Endocrinol 2014 May;2(5):369-84                             |
| 825 | Exploratory Dataset | Diabetes Obes Metab, 2018, 20: 2768-2777                                    |
| 826 | Exploratory Dataset | Lancet Diabetes Endocrinol 2014 Sep;2(9):691-700                            |
| 827 | Exploratory Dataset | Lancet 2014 Aug 23;384(9944):665-73                                         |
| 828 | Exploratory Dataset | Diabetes Metab Res Rev, 2014, 30: 726-35                                    |
| 829 | Exploratory Dataset | Lancet Oncol 2014 Oct;15(11):1224-35                                        |
| 830 | Exploratory Dataset | Lancet Diabetes Endocrinol 2013 Nov;1(3):208-19                             |
| 831 | Exploratory Dataset | N Engl J Med, 2016, 375: 311-22                                             |
| 832 | Exploratory Dataset | Diabetes Obes Metab 2017 Aug;19(8):1188-1192                                |
| 833 | Exploratory Dataset | Lancet Oncol 2015 May;16(5):499-508                                         |
| 834 | Exploratory Dataset | Ann Rheum Dis 2015 Feb;74(2):333-40                                         |
| 835 | Exploratory Dataset | Ann Oncol 2015 Sep;26(9):1904-1910                                          |

|     |                     |                                                  |
|-----|---------------------|--------------------------------------------------|
| 836 | Exploratory Dataset | Dermatol Surg, 2015, 41: 102-12                  |
| 837 | Exploratory Dataset | Drugs Aging 2015 Jun;32(6):469-76                |
| 838 | Exploratory Dataset | Adv Ther 2014 Jun;31(6):621-38                   |
| 839 | Exploratory Dataset | Lancet Oncol, 2015, 16: 338-48                   |
| 840 | Exploratory Dataset | J Clin Oncol, 2015, 33: 723-31                   |
| 841 | Exploratory Dataset | Expert Opin Pharmacother 2012 Dec;13(17):2443-52 |
| 842 | Exploratory Dataset | Lancet Diabetes Endocrinol 2016 Mar;4(3):211-220 |
| 843 | Exploratory Dataset | Eur Respir J 2013 Dec;42(6):1484-94              |
| 844 | Exploratory Dataset | Diabetes Obes Metab 2013 Sep;15(9):833-43        |
| 845 | Exploratory Dataset | Lancet Oncol, 2014, 15: 799-808                  |
| 846 | Exploratory Dataset | J Clin Oncol, 2012, 30: 362-71                   |
| 847 | Exploratory Dataset | J Pain, 2014, 15: 835-44                         |
| 848 | Exploratory Dataset | Eur J Cancer 2015 Aug;51(12):1511-28             |
| 849 | Exploratory Dataset | Clin Ther 2015 Aug;37(8):1773-88e1               |
| 850 | Exploratory Dataset | Ann Oncol, 2015, 26: 2457-63                     |
| 851 | Exploratory Dataset | Ann Emerg Med 2012 Jun;59(6):504-12e1-2          |
| 852 | Exploratory Dataset | N Engl J Med, 2014, 371: 424-33                  |
| 853 | Exploratory Dataset | J Clin Oncol 2016 Feb 10;34(5):427-35            |
| 854 | Exploratory Dataset | Diabetes Obes Metab 2015 Jan;17(1):42-51         |
| 855 | Exploratory Dataset | J Antimicrob Chemother, 2014, 69: 1111-8         |
| 856 | Exploratory Dataset | Gastroenterology 2014 Sep;147(3):618-627e3       |
| 857 | Exploratory Dataset | Lancet Infect Dis 2013 Nov;13(11):927-35         |
| 858 | Exploratory Dataset | Lancet 2013 Aug 24;382(9893):700-8               |
| 859 | Exploratory Dataset | Eur J Cancer, 2014, 50: 2072-81                  |

|     |                     |                                                     |
|-----|---------------------|-----------------------------------------------------|
| 860 | Exploratory Dataset | Arthritis Care Res (Hoboken), 2014, 66: 1653-61     |
| 861 | Exploratory Dataset | J Clin Oncol 2012 May 1;30(13):1484-91              |
| 862 | Exploratory Dataset | N Engl J Med, 2016, 375: 1231-41                    |
| 863 | Exploratory Dataset | Br J Cancer 2012 Apr 24;106(9):1469-74              |
| 864 | Exploratory Dataset | Int Arch Allergy Immunol, 2016, 169: 135-45         |
| 865 | Exploratory Dataset | Lancet Respir Med, 2014, 2: 879-890                 |
| 866 | Exploratory Dataset | Lancet, 2015, 386: 552-61                           |
| 867 | Exploratory Dataset | Diabetol Int 6, 125–138 (2015)                      |
| 868 | Exploratory Dataset | Ann Rheum Dis 2014 Sep;73(9):1607-15                |
| 869 | Exploratory Dataset | Clin Pharmacol Ther 2014 Sep;96(3):390-6            |
| 870 | Exploratory Dataset | J Clin Oncol 2015 Aug 20;33(24):2667-74             |
| 871 | Exploratory Dataset | N Engl J Med, 2012, 367: 107-14                     |
| 872 | Exploratory Dataset | Contemp Clin Trials 2017 Sep;60:72-77               |
| 873 | Exploratory Dataset | Ann Oncol 2016 Dec;27(12):2196-2203                 |
| 874 | Exploratory Dataset | Ann Oncol, 2014, 25: 968-74                         |
| 875 | Exploratory Dataset | Korean J Intern Med 2019 Jul;34(4):917-931          |
| 876 | Exploratory Dataset | Lancet 2013 Aug 3;382(9890):409-416                 |
| 877 | Exploratory Dataset | Arthritis Rheumatol 2014 Aug;66(8):2091-102         |
| 878 | Exploratory Dataset | Ann Emerg Med 2015 May;65(5):479-488e2              |
| 879 | Exploratory Dataset | Epilepsia, 2015, 56: 1890-8                         |
| 880 | Exploratory Dataset | J Acquir Immune Defic Syndr 2015 Dec 15;70(5):515-9 |
| 881 | Exploratory Dataset | Ann Oncol 2015 May;26(5):943-949                    |
| 882 | Exploratory Dataset | J Clin Endocrinol Metab 2016 Jun;101(6):2528-35     |
| 883 | Exploratory Dataset | Neurotherapeutics 2015 Apr;12(2):455-60             |

|     |                     |                                                |
|-----|---------------------|------------------------------------------------|
| 884 | Exploratory Dataset | Lancet 2013 Jan 26;381(9863):295-302           |
| 885 | Exploratory Dataset | Arthritis Rheumatol 2016 Sep;68(9):2174-83     |
| 886 | Exploratory Dataset | J Am Acad Dermatol 2016 May;74(5):841-50       |
| 887 | Exploratory Dataset | Aliment Pharmacol Ther 2015 Nov;42(10):1170-81 |
| 888 | Exploratory Dataset | Gut 2015 Jun;64(6):894-900                     |
| 889 | Exploratory Dataset | J Clin Oncol, 2017, 35: 3449-3457              |
| 890 | Exploratory Dataset | Lancet Oncol, 2016, 17: 153-163                |
| 891 | Exploratory Dataset | Diabetes Res Clin Pract 2015 Oct;110(1):82-90  |
| 892 | Exploratory Dataset | Cardiovasc Diabetol 2015 Dec 23;14:154         |
| 893 | Exploratory Dataset | J Crohns Colitis 2016 Apr;10(4):418-28         |
| 894 | Exploratory Dataset | JAMA Psychiatry 2016 Oct 1;73(10):1056-1063    |
| 895 | Exploratory Dataset | Clin Cancer Res 2015 Apr 1;21(7):1574-82       |
| 896 | Exploratory Dataset | Diabetes Care 2014 Jul;37(7):1815-23           |
| 897 | Exploratory Dataset | Respir Med 2013 Oct;107(10):1538-46            |
| 898 | Exploratory Dataset | Diabetes Obes Metab 2015 Feb;17(2):152-60      |
| 899 | Exploratory Dataset | Clin Ther 2015 Jul 1;37(7):1493-502            |
| 900 | Exploratory Dataset | J Diabetes Investig 2012 Dec 20;3(6):517-25    |
| 901 | Exploratory Dataset | Anesthesiology<br>2012 Oct;117(4):755-64       |
| 902 | Exploratory Dataset | N Engl J Med 2015; 372:621-630                 |
| 903 | Exploratory Dataset | Ther Adv Neurol Disord 2017 Sep;10(9):315-325  |
| 904 | Exploratory Dataset | Pediatrics, 2011, 128: e1496-501               |
| 905 | Exploratory Dataset | Lancet 2014 Jul 26;384(9940):309-18            |
| 906 | Exploratory Dataset | J Clin Transl Endocrinol 2014 May 5;1(2):54-60 |

|     |                     |                                                  |
|-----|---------------------|--------------------------------------------------|
| 907 | Exploratory Dataset | Arthritis Rheumatol 2017 Jun;69(6):1144-1153     |
| 908 | Exploratory Dataset | N Engl J Med 2015 Dec 24;373(26):2534-48         |
| 909 | Exploratory Dataset | J Rheumatol 2016 Mar;43(3):495-503               |
| 910 | Exploratory Dataset | Respiratory Medicine 2015;109(2):170-9           |
| 911 | Exploratory Dataset | Ann Oncol, 2015, 26: 894-901                     |
| 912 | Exploratory Dataset | N Engl J Med 2014 Jul 24;371(4):326-38           |
| 913 | Exploratory Dataset | Diabetes Obes Metab, 2015, 17: 665-74            |
| 914 | Exploratory Dataset | N Engl J Med 2016 Nov 17;375(20):1946-1960       |
| 915 | Exploratory Dataset | Diabetes Care 2015 Mar;38(3):420-8               |
| 916 | Exploratory Dataset | JAMA 2015 Feb 17;313(7):687-94                   |
| 917 | Exploratory Dataset | Arthritis Rheumatol 2015 Oct;67(10):2591-600     |
| 918 | Exploratory Dataset | Acta Oncol 2012 Sep;51(7):860-6                  |
| 919 | Exploratory Dataset | Diabetes Care 2015 Mar;38(3):431-8               |
| 920 | Exploratory Dataset | Rheumatol Ther 2017 Dec;4(2):475-488             |
| 921 | Exploratory Dataset | Diabetes Obes Metab 2015 Jan;17(1):23-31         |
| 922 | Exploratory Dataset | Cancer 2016 Feb 15;122(4):574-81                 |
| 923 | Exploratory Dataset | N Engl J Med 2015 Oct;373(14):1329-39            |
| 924 | Exploratory Dataset | Diabetes Obes Metab 2015 Nov;17(11):1075-84      |
| 925 | Exploratory Dataset | Gut 2017 Jun;66(6):1049-1059                     |
| 926 | Exploratory Dataset | Br J Cancer 2016 Nov 8;115(10):1206-1214         |
| 927 | Exploratory Dataset | Expert Opin Pharmacother 2014 Aug;15(11):1501-15 |
| 928 | Exploratory Dataset | Oncologist 2017 Mar;22(3):264-271                |
| 929 | Exploratory Dataset | Diabetes Care, 2015, 38: 384-93                  |
| 930 | Exploratory Dataset | Diabetes Care 2015 Mar;38(3):394-402             |

|     |                     |                                                  |
|-----|---------------------|--------------------------------------------------|
| 931 | Exploratory Dataset | Ann Hematol 2013 May;92(5):653-60                |
| 932 | Exploratory Dataset | Rheumatology (Oxford) 2016 Jan;55(1):49-55       |
| 933 | Exploratory Dataset | N Engl J Med 2015 Apr 16;372(16):1500-9          |
| 934 | Exploratory Dataset | N Engl J Med 2016 Sep 1;375(9):850-60            |
| 935 | Exploratory Dataset | JAMA Intern Med 2016 Nov 1;176(11):1630-1637     |
| 936 | Exploratory Dataset | Lancet 2014 Jun 28;383(9936):2222-31             |
| 937 | Exploratory Dataset | Lancet 2016 May 7;387(10031):1921-7              |
| 938 | Exploratory Dataset | J Clin Oncol 2016 Nov 1;34(31):3740-3748         |
| 939 | Exploratory Dataset | J Clin Oncol 2017 Feb;35(4):412-420              |
| 940 | Exploratory Dataset | Lancet Oncol 2016 Jan;17(1):57-66                |
| 941 | Exploratory Dataset | Diabetes Ther 2015 Jun;6(2):127-42               |
| 942 | Exploratory Dataset | N Engl J Med 2016 Sep 1;375(9):840-9             |
| 943 | Exploratory Dataset | BMC Pulm Med 2014 Nov 18;14:178                  |
| 944 | Exploratory Dataset | J Crohns Colitis 2017 Jul 1;11(7):811-819        |
| 945 | Exploratory Dataset | J Rheumatol 2016 Mar;43(3):504-11                |
| 946 | Exploratory Dataset | J Clin Psychiatry 2016;77(3):371-8               |
| 947 | Exploratory Dataset | J Allergy Clin Immunol 2019 Apr;143(4):1395-1402 |
| 948 | Exploratory Dataset | N Engl J Med 2016 Jul 28;375(4):345-56           |
| 949 | Exploratory Dataset | N Engl J Med 2016 May 12;374(19):1822-30         |
| 950 | Exploratory Dataset | Gut 2015 Feb;64(2):243-9                         |
| 951 | Exploratory Dataset | N Engl J Med, 2015, 373: 136-44                  |
| 952 | Exploratory Dataset | J Allergy Clin Immunol 2015 May;135(5):1171-8e1  |
| 953 | Exploratory Dataset | Arthritis Rheumatol 2016 Sep;68(9):2163-73       |
| 954 | Exploratory Dataset | J Crohns Colitis 2016 Nov;10(11):1294-1302       |

|     |                     |                                             |
|-----|---------------------|---------------------------------------------|
| 955 | Exploratory Dataset | Pain Physician Nov-Dec 2013;16(6):E749-62   |
| 956 | Exploratory Dataset | N Engl J Med 2013 May 16;368(20):1878-87    |
| 957 | Exploratory Dataset | J Diabetes Investig 2016 May;7(3):366-73    |
| 958 | Exploratory Dataset | Ann Oncol 2018 Jan; 29(1): 154–161          |
| 959 | Exploratory Dataset | N Engl J Med 2015 Apr 16;372(16):1489-99    |
| 960 | Exploratory Dataset | N Engl J Med 2014 May 8;370(19):1809-19     |
| 961 | Exploratory Dataset | N Engl J Med 2014 Jun 12;370(24):2295-306   |
| 962 | Exploratory Dataset | J Crohns Colitis 2017 Jul 1;11(7):785-791   |
| 963 | Exploratory Dataset | Ann Rheum Dis 2018 Feb;77(2):212-220        |
| 964 | Exploratory Dataset | Eur J Anaesthesiol 2014 Dec;31(12):654-62   |
| 965 | Exploratory Dataset | J Neurol Sci 2013 Jul 15;330(1-2):94-9      |
| 966 | Exploratory Dataset | Lancet 2016 Sep 24;388(10051):1281-90       |
| 967 | Exploratory Dataset | N Engl J Med 2013 May 16;368(20):1867-77    |
| 968 | Exploratory Dataset | Diabetes Metab Res Rev 2014 Oct;30(7):582-9 |
| 969 | Exploratory Dataset | Arthritis Rheumatol 2017 Apr;69(4):709-719  |
| 970 | Exploratory Dataset | Br J Dermatol 2015 Feb;172(2):484-93        |
| 971 | Exploratory Dataset | Diabetes Obes Metab, 2015, 17: 974-83       |
| 972 | Exploratory Dataset | Clin Cancer Res 2017 Apr 15;23(8):1937-1944 |
| 973 | Exploratory Dataset | J Clin Oncol 2013 Jun 1;31(16):1931-8       |
| 974 | Exploratory Dataset | N Engl J Med, 2014, 371: 213-23             |
| 975 | Exploratory Dataset | Diabetes Obes Metab, 2015, 17: 994-1002     |
| 976 | Exploratory Dataset | Ann Oncol 2017 Jul 1;28(7):1631-1639        |
| 977 | Exploratory Dataset | N Engl J Med, 2014, 371: 1877-88            |
| 978 | Exploratory Dataset | Lancet Oncol 2015 Jun;16(6):619-29          |

|      |                     |                                                     |
|------|---------------------|-----------------------------------------------------|
| 979  | Exploratory Dataset | Oncologist 2016 Sep;21(9):1085-90                   |
| 980  | Exploratory Dataset | Lancet, 2015, 386: 541-51                           |
| 981  | Exploratory Dataset | N Engl J Med 2015; 372:30-39                        |
| 982  | Exploratory Dataset | Am J Chin Med 2013;41(2):263-80                     |
| 983  | Exploratory Dataset | Ann Rheum Dis 2017 Dec;76(12):2001-2008             |
| 984  | Exploratory Dataset | J Clin Oncol 2016 Sep 1;34(25):3005-13              |
| 985  | Exploratory Dataset | Diabetes Care 2015 Mar;38(3):376-83                 |
| 986  | Exploratory Dataset | Endocr Pract 2017 Mar;23(3):258-265                 |
| 987  | Exploratory Dataset | Lancet 2017 Mar 25;389(10075):1206-1217             |
| 988  | Exploratory Dataset | Lancet Oncol, 2016, 17: 200-211                     |
| 989  | Exploratory Dataset | Cardiovasc Drugs Ther 2016 Oct;30(5):473-483        |
| 990  | Exploratory Dataset | Diabetes Care, 2015, 38: 2018-24                    |
| 991  | Exploratory Dataset | Eur Heart J 2015 Nov 14;36(43):2996-3003            |
| 992  | Exploratory Dataset | Alcohol Clin Exp Res 2018 Jan;42(1):128-134         |
| 993  | Exploratory Dataset | J Clin Oncol 2017 Jan 20;35(3):343-351              |
| 994  | Exploratory Dataset | J Eur Acad Dermatol Venereol 2015 Jun;29(6):1082-90 |
| 995  | Exploratory Dataset | J Clin Oncol 2018 Aug 10;36(23):2386-2394           |
| 996  | Exploratory Dataset | N Engl J Med 2015 Jul 9;373(2):123-35               |
| 997  | Exploratory Dataset | Am Heart J 2015 Jun;169(6):906-915e13               |
| 998  | Exploratory Dataset | Eur Heart J 2015 May 14;36(19):1186-94              |
| 999  | Exploratory Dataset | Int J Cardiol 2014 Sep;176(1):55-61                 |
| 1000 | Exploratory Dataset | Lancet Oncol 2015 May;16(5):561-8                   |
| 1001 | Exploratory Dataset | Ann Rheum Dis 2017 May;76(5):831-839                |
| 1002 | Exploratory Dataset | Lancet 2016 Feb 20;387(10020):770-8                 |



|      |                     |                                               |
|------|---------------------|-----------------------------------------------|
| 1003 | Exploratory Dataset | Diabetes Obes Metab 2016 Nov;18(11):1134-1137 |
| 1004 | Exploratory Dataset | Diabetes Care 2015 Nov;38(11):2009-17         |
| 1005 | Exploratory Dataset | N Engl J Med 2016 May 5;374(18):1754-62       |
| 1006 | Exploratory Dataset | Ann Rheum Dis 2016 Jun;75(6):1057-64          |
| 1007 | Exploratory Dataset | Diabetes Obes Metab, 2017, 19: 979-988        |
| 1008 | Exploratory Dataset | Surg Endosc, 2014, 28: 1641-7                 |
| 1009 | Exploratory Dataset | J Clin Oncol, 2016, 34: 2098-106              |
| 1010 | Exploratory Dataset | N Engl J Med 2015 Nov 5;373(19):1803-13       |
| 1011 | Exploratory Dataset | N Engl J Med 2015 Oct 22;373(17):1627-39      |
| 1012 | Exploratory Dataset | Diabetol Metab Syndr 2017 May 15;9:35         |
| 1013 | Exploratory Dataset | N Engl J Med 2014 May 22;370(21):1993-2001    |
| 1014 | Exploratory Dataset | Curr Med Res Opin 2017 Oct;33(10):1861-1868   |
| 1015 | Exploratory Dataset | Lancet Oncol 2016 Sep;17(9):1248-60           |
| 1016 | Exploratory Dataset | Ann Rheum Dis 2017 Jan;76(1):79-87            |
| 1017 | Exploratory Dataset | Cardiovasc Diabetol 2017 Jan 21;16(1):13      |
| 1018 | Exploratory Dataset | Lancet Oncol 2015; 16: 908-18                 |
| 1019 | Exploratory Dataset | Prostate, 2016, 76: 1519-1527                 |
| 1020 | Exploratory Dataset | Br J Dermatol 2016 Aug;175(2):273-86          |
| 1021 | Exploratory Dataset | N Engl J Med 2015 Oct;373(14):1318-28         |
| 1022 | Exploratory Dataset | Lancet Oncol 2016 Dec;17(12):1661-1671        |
| 1023 | Exploratory Dataset | J Clin Lipidol Nov-Dec 2015;9(6):758-769      |
| 1024 | Exploratory Dataset | Arthritis Rheumatol 2017 Feb;69(2):277-290    |
| 1025 | Exploratory Dataset | N Engl J Med 2017 Feb 16;376(7):652-662       |
| 1026 | Exploratory Dataset | Arthritis Rheumatol 2017 Mar;69(3):506-517    |

|      |                     |                                                   |
|------|---------------------|---------------------------------------------------|
| 1027 | Exploratory Dataset | Gastroenterology 2017 Jul;153(1):77-86e6          |
| 1028 | Exploratory Dataset | N Engl J Med, 2017, 377: 352-360                  |
| 1029 | Exploratory Dataset | N Engl J Med, 2016, 375: 1834-1844                |
| 1030 | Exploratory Dataset | N Engl J Med 2016 Mar 31;374(13):1243-52          |
| 1031 | Exploratory Dataset | Ann Rheum Dis 2017 Jan;76(1):88-95                |
| 1032 | Exploratory Dataset | Lancet Oncol 2015 Apr;16(4):375-84                |
| 1033 | Exploratory Dataset | N Engl J Med 2015; 372:320-330                    |
| 1034 | Exploratory Dataset | N Engl J Med, 2015, 373: 2425-37                  |
| 1035 | Exploratory Dataset | Am J Hematol, 2018, 93: 1402-1410                 |
| 1036 | Exploratory Dataset | J Clin Endocrinol Metab 2015 Aug;100(8):3140-8    |
| 1037 | Exploratory Dataset | Atherosclerosis 2016 Jan;244:138-46               |
| 1038 | Exploratory Dataset | N Engl J Med, 2019, 380: 347-357                  |
| 1039 | Exploratory Dataset | Diabetes Care 2017 Feb;40(2):201-209              |
| 1040 | Exploratory Dataset | N Engl J Med 2016 Nov 17;375(20):1925-1936        |
| 1041 | Exploratory Dataset | J Dermatol Sci 2016 Jan;81(1):44-52               |
| 1042 | Exploratory Dataset | Lancet 2015 Sep 19;386(9999):1137-46              |
| 1043 | Exploratory Dataset | Rheumatology (Oxford) 2017 Nov 1;56(11):1993-2003 |
| 1044 | Exploratory Dataset | J Crohns Colitis 2016 Jun;10(6):631-40            |
| 1045 | Exploratory Dataset | Scand J Rheumatol 2018 Jul;47(4):276-281          |
| 1046 | Exploratory Dataset | Lancet 2017 Jan 7;389(10064):56-66                |
| 1047 | Exploratory Dataset | Diabetes Obes Metab 2017 Feb;19(2):266-274        |
| 1048 | Exploratory Dataset | N Engl J Med 2017; 377:317-328                    |
| 1049 | Exploratory Dataset | Clin Microbiol Infect, 2016, 22: 565e1-9          |
| 1050 | Exploratory Dataset | J Am Acad Dermatol 2017 Jan;76(1):70-80           |

|      |                     |                                                      |
|------|---------------------|------------------------------------------------------|
| 1051 | Exploratory Dataset | Diabetes Care 2016 Mar;39(3):353-62                  |
| 1052 | Exploratory Dataset | Cardiovasc Diabetol 2017 Feb 23;16(1):27             |
| 1053 | Exploratory Dataset | Aliment Pharmacol Ther 2016 Jul;44(2):157-69         |
| 1054 | Exploratory Dataset | J Clin Oncol 2017 Feb 20;35(6):591-597               |
| 1055 | Exploratory Dataset | J Child Adolesc Psychopharmacol 2017 Feb;27(1):66-74 |
| 1056 | Exploratory Dataset | Lancet Oncol, 2017, 18: 1261-1273                    |
| 1057 | Exploratory Dataset | N Engl J Med 2015; 373:23-34                         |
| 1058 | Exploratory Dataset | N Engl J Med 2017 Oct 5;377(14):1345-1356            |
| 1059 | Exploratory Dataset | N Engl J Med 2016 Dec 1;375(22):2154-2164            |
| 1060 | Exploratory Dataset | Lancet Oncol 2016 Jul;17(7):917-927                  |
| 1061 | Exploratory Dataset | N Engl J Med 2015 Jun 25;372(26):2521-32             |
| 1062 | Exploratory Dataset | Lancet 2017;390(10105): 1853–1862                    |
| 1063 | Exploratory Dataset | N Engl J Med 2017 Oct 19;377(16):1525-1536           |
| 1064 | Exploratory Dataset | N Engl J Med, 2018, 379: 2517-2528                   |
| 1065 | Exploratory Dataset | Diabetes Obes Metab 2017 Jun;19(6):892-896           |
| 1066 | Exploratory Dataset | Ann Rheum Dis 2017 Jun;76(6):1009-1019               |
| 1067 | Exploratory Dataset | Lancet Oncol 2016 Dec;17(12):1732-1742               |
| 1068 | Exploratory Dataset | Lancet 2016 Apr 30;387(10030):1837-46                |
| 1069 | Exploratory Dataset | Lancet 2016 Apr 9;387(10027):1540-1550               |
| 1070 | Exploratory Dataset | Diabetes Obes Metab, 2016, 18: 1191-1198             |
| 1071 | Exploratory Dataset | Lancet Oncol 2018 Oct;19(10):1315-1327               |
| 1072 | Exploratory Dataset | Lancet, 2016, 388: 2128-2141                         |
| 1073 | Exploratory Dataset | JAMA, 2017, 318: 1460-1470                           |
| 1074 | Exploratory Dataset | Lancet Oncol 2016 Nov;17(11):1558-1568               |

|      |                     |                                                       |
|------|---------------------|-------------------------------------------------------|
| 1075 | Exploratory Dataset | N Engl J Med 2015 May 21;372(21):2006-17              |
| 1076 | Exploratory Dataset | Lancet Oncol 2016 Jul;17(7):883-895                   |
| 1077 | Exploratory Dataset | Lancet, 2016, 388: 2115-2127                          |
| 1078 | Exploratory Dataset | Lancet Diabetes Endocrinol, 2017, 5: 341-354          |
| 1079 | Exploratory Dataset | Int J Clin Oncol 2015 Oct;20(5):905-12                |
| 1080 | Exploratory Dataset | Lancet Oncol 2016 Apr;17(4):425-439                   |
| 1081 | Exploratory Dataset | Cardiovasc Diabetol 2015 Jan 30;14:11                 |
| 1082 | Exploratory Dataset | N Engl J Med 2016 Nov 3;375(18):1738-1748             |
| 1083 | Exploratory Dataset | Diabetes Obes Metab 2017 May;19(5):721-728            |
| 1084 | Exploratory Dataset | JAMA, 2017, 318: 557-566                              |
| 1085 | Exploratory Dataset | Arthritis Rheumatol 2016 Dec;68(12):2867-2877         |
| 1086 | Exploratory Dataset | Lancet Infect Dis 2015 Apr;15(4):397-404              |
| 1087 | Exploratory Dataset | Cancer Med 2018 Apr;7(4):1043-1055                    |
| 1088 | Exploratory Dataset | J Child Adolesc Psychopharmacol 2015 Jun;25(5):402-14 |
| 1089 | Exploratory Dataset | Diabetes Ther 2018 Feb;9(1):49-66                     |
| 1090 | Exploratory Dataset | Arthritis Res Ther 2018 Mar 15;20(1):47               |
| 1091 | Exploratory Dataset | Lancet Neurol 2017 Dec;16(12):976-986                 |
| 1092 | Exploratory Dataset | Diabetes Ther 2018 Feb;9(1):193-207                   |
| 1093 | Exploratory Dataset | N Engl J Med, 2018, 378: 2465-2474                    |
| 1094 | Exploratory Dataset | Lancet 2017 Jan 21;389(10066):255-265                 |
| 1095 | Exploratory Dataset | Diabetes Obes Metab, 2016, 18: 803-11                 |
| 1096 | Exploratory Dataset | Arthritis Res Ther 2017 Dec 22;19(1):285              |
| 1097 | Exploratory Dataset | Neuro Oncol 2018 Apr 9;20(5):674-686                  |
| 1098 | Exploratory Dataset | Lancet 2017 Apr 29;389(10080):1699-1709               |

|      |                     |                                                      |
|------|---------------------|------------------------------------------------------|
| 1099 | Exploratory Dataset | Diabetes Obes Metab, 2018, 20: 530-540               |
| 1100 | Exploratory Dataset | Lancet Oncol 2016 Nov;17(11):1497-1508               |
| 1101 | Exploratory Dataset | N Engl J Med, 2017, 376: 2415-2426                   |
| 1102 | Exploratory Dataset | N Engl J Med, 2018, 378: 1583-1592                   |
| 1103 | Exploratory Dataset | Lancet 2017 Jan 21;389(10066):266-275                |
| 1104 | Exploratory Dataset | Lancet Diabetes Endocrinol, 2017, 5: 251-260         |
| 1105 | Exploratory Dataset | Arthritis Rheumatol 2016 Dec;68(12):2857-2866        |
| 1106 | Exploratory Dataset | N Engl J Med, 2017, 376: 2448-2458                   |
| 1107 | Exploratory Dataset | Ann Allergy Asthma Immunol 2017 Apr;118(4):489-499e1 |
| 1108 | Exploratory Dataset | J Diabetes 2018 Jul;10(7):589-599                    |
| 1109 | Exploratory Dataset | AIDS 2017 Nov 28;31(18):2503-2514                    |
| 1110 | Exploratory Dataset | N Engl J Med 2016 Nov 10;375(19):1856-1867           |
| 1111 | Exploratory Dataset | Antivir Ther 2017;22(4):295-305                      |
| 1112 | Exploratory Dataset | Respirology 2014 Nov;19(8):1178-82                   |
| 1113 | Exploratory Dataset | J Clin Oncol 2017 Sep 1;35(25):2875-2884             |
| 1114 | Exploratory Dataset | Lancet Diabetes Endocrinol, 2017, 5: 355-366         |
| 1115 | Exploratory Dataset | J Asthma 2018 Jun;55(6):640-650                      |
| 1116 | Exploratory Dataset | Allergy Asthma Proc 2017 Sep 21;38(5):343-353        |
| 1117 | Exploratory Dataset | N Engl J Med 2016 Nov 10;375(19):1823-1833           |
| 1118 | Exploratory Dataset | Diabetes Obes Metab, 2017, 19: 1024-1031             |
| 1119 | Exploratory Dataset | J Diabetes Investig 2016 Jul;7(4):555-64             |
| 1120 | Exploratory Dataset | Respir Med 2017 Nov;132:31-41                        |
| 1121 | Exploratory Dataset | Rheumatol Ther 2018 Dec;5(2):447-462                 |
| 1122 | Exploratory Dataset | N Engl J Med 2018 Jun 21;378(25):2399-2410           |

|      |                     |                                               |
|------|---------------------|-----------------------------------------------|
| 1123 | Exploratory Dataset | Allergy Asthma Proc 2017 Jul 24;38(4):264-276 |
| 1124 | Exploratory Dataset | Diabetes Obes Metab 2016 Dec;18(12):1207-1216 |
| 1125 | Exploratory Dataset | Diabetes Obes Metab 2017 Oct;19(10):1397-1407 |
| 1126 | Exploratory Dataset | N Engl J Med 2015 Dec 31;373(27):2599-607     |
| 1127 | Exploratory Dataset | Cardiovasc Diabetol 2016 Jun 18;15:89         |
| 1128 | Exploratory Dataset | Diabetes Care, 2018, 41: 2136-2146            |
| 1129 | Exploratory Dataset | N Engl J Med 2018 Apr 5;378(14):1277-1290     |
| 1130 | Exploratory Dataset | N Engl J Med 2017 Mar 16;376(11):1015-1026    |
| 1131 | Exploratory Dataset | Lancet Oncol 2019 Jan;20(1):43-56             |
| 1132 | Exploratory Dataset | J Am Acad Dermatol 2017 Oct;77(4):667-674     |
| 1133 | Exploratory Dataset | Lancet 2017;390(10111):2461–2471              |
| 1134 | Exploratory Dataset | J Asthma 2018 Sep;55(9):984-993               |
| 1135 | Exploratory Dataset | Lancet, 2018, 391: 748-757                    |
| 1136 | Exploratory Dataset | Eye (Lond), 2017, 31: 389-394                 |
| 1137 | Exploratory Dataset | Lancet 2018;391(10136):2213-2224              |
| 1138 | Exploratory Dataset | Lancet Respir Med, 2017, 5: 568-576           |
| 1139 | Exploratory Dataset | Lancet 2018 Oct 13;392(10155):1330-1339       |
| 1140 | Exploratory Dataset | Lancet 2017 Jun 10;389(10086):2317-2327       |
| 1141 | Exploratory Dataset | Diabetes Obes Metab 2017 Jun;19(6):874-882    |
| 1142 | Exploratory Dataset | J Hepatol 2016 Dec;65(6):1112-1119            |
| 1143 | Exploratory Dataset | N Engl J Med 2018;378(19):1789–1801           |
| 1144 | Exploratory Dataset | Lancet, 2018, 392: 123-133                    |
| 1145 | Exploratory Dataset | Lancet Oncol 2018 May;19(5):672-681           |
| 1146 | Exploratory Dataset | Lancet Oncol, 2018, 19: 1468-1479             |

|      |                     |                                                                                                                                                                                               |
|------|---------------------|-----------------------------------------------------------------------------------------------------------------------------------------------------------------------------------------------|
| 1147 | Exploratory Dataset | Ann Rheum Dis 2018 Jun;77(6):890-897                                                                                                                                                          |
| 1148 | Exploratory Dataset | Lancet 2018 Mar 3;391(10123):839-849<br>( <a href="https://www.viraled.com/modules/info/files/files_58c03e5ca1c3apdf">https://www.viraled.com/modules/info/files/files_58c03e5ca1c3apdf</a> ) |
| 1149 | Exploratory Dataset | N Engl J Med, 2019, 381: 121-131                                                                                                                                                              |
| 1150 | Exploratory Dataset | N Engl J Med 2018 May 31;378(22):2093-2104                                                                                                                                                    |
| 1151 | Exploratory Dataset | Lancet Oncol 2018 Mar;19(3):416-426                                                                                                                                                           |
| 1152 | Exploratory Dataset | N Engl J Med 2018;378(22):2078-2092                                                                                                                                                           |
| 1153 | Exploratory Dataset | Lancet 2018 Jun 23;391(10139):2503-2512                                                                                                                                                       |
| 1154 | Exploratory Dataset | J Clin Oncol, 2019, 37: 2974-2986                                                                                                                                                             |
| 1155 | Exploratory Dataset | Lancet 2018 Dec 8;392(10163):2441-2451                                                                                                                                                        |
| 1156 | Exploratory Dataset | Arthritis Rheumatol 2019 Apr;71(4):599-611                                                                                                                                                    |
| 1157 | Exploratory Dataset | Lancet 2018 Jun 23;391(10139):2513-2524                                                                                                                                                       |
| 1158 | Exploratory Dataset | J Periodontol, 2017, 88: 1244-1252                                                                                                                                                            |
| 1159 | Exploratory Dataset | J Dent, 2018, 72: 76-79                                                                                                                                                                       |
| 1160 | Exploratory Dataset | J Clin Oncol 2016 Aug 10;34(23):2728-35                                                                                                                                                       |
| 1161 | Exploratory Dataset | Lancet Infect Dis, 2016, 16: 905-14                                                                                                                                                           |
| 1162 | Exploratory Dataset | Int J Tuberc Lung Dis 2012 Feb;16(2):268-72                                                                                                                                                   |
| 1163 | Exploratory Dataset | BMC Cancer 2015 May 11;15:392                                                                                                                                                                 |
| 1164 | Exploratory Dataset | Curr Med Res Opin 2014 Jul;30(7):1231-44                                                                                                                                                      |
| 1165 | Exploratory Dataset | Thorax 2012 Aug;67(8):689-93                                                                                                                                                                  |
| 1166 | Exploratory Dataset | J Clin Oncol, 2010, 28: 3191-8                                                                                                                                                                |
| 1167 | Exploratory Dataset | J Clin Endocrinol Metab 2009 Feb;94(2):538-44                                                                                                                                                 |
| 1168 | Exploratory Dataset | J Clin Endocrinol Metab 2012 Jan;97(1):286-92                                                                                                                                                 |
| 1169 | Exploratory Dataset | Lancet, 2012, 380: 660-7                                                                                                                                                                      |

|      |                     |                                                      |
|------|---------------------|------------------------------------------------------|
| 1170 | Exploratory Dataset | Ann Rheum Dis 2014 Jun;73(6):1044-51                 |
| 1171 | Exploratory Dataset | J Child Psychol Psychiatry 2015 Apr;56(4):444-52     |
| 1172 | Exploratory Dataset | JAMA, 2013, 309: 1260-7                              |
| 1173 | Exploratory Dataset | Lancet 2017;390(10095):659-68                        |
| 1174 | Exploratory Dataset | J Negat Results Biomed, 2015, 14: 15                 |
| 1175 | Exploratory Dataset | Inflamm Bowel Dis 2015 Oct;21(10):2247-53            |
| 1176 | Exploratory Dataset | Gastroenterology 2013 Oct;145(4):766-74e1            |
| 1177 | Exploratory Dataset | J Pain Symptom Manage, 2015, 49: 161-72              |
| 1178 | Exploratory Dataset | Lancet Oncol 2014 Jul;15(8):862-73                   |
| 1179 | Exploratory Dataset | Osteoarthritis Cartilage, 2013, 21: 22-7             |
| 1180 | Exploratory Dataset | Cancer Prev Res (Phila) 2011 Aug;4(8):1181-9         |
| 1181 | Exploratory Dataset | Arthritis Res Ther 2012 Oct 24;14(5):R230            |
| 1182 | Exploratory Dataset | Lancet Oncol 2013 May;14(6):490-9                    |
| 1183 | Exploratory Dataset | Lancet Oncol 2017 Apr;18(4):486-499                  |
| 1184 | Exploratory Dataset | Laryngoscope, 2015, 125(5):1048-1055                 |
| 1185 | Exploratory Dataset | Lancet Infect Dis, 2017, 17: 322-329                 |
| 1186 | Exploratory Dataset | J Clin Oncol 2012 May 1;30(13):1484-91               |
| 1187 | Exploratory Dataset | Ther Adv Respir Dis Jan-Dec 2018;12:1753466618777924 |
| 1188 | Exploratory Dataset | Diabetes Obes Metab 2010 Sep;12(9):780-9             |
| 1189 | Exploratory Dataset | Allergy, 2011, 66: 1457-68                           |
| 1190 | Exploratory Dataset | Diabetes Obes Metab 2013 Dec;15(12):1111-9           |
| 1191 | Exploratory Dataset | Diabetes Obes Metab 2015 Jul;17(7):699-702           |
| 1192 | Exploratory Dataset | Int J Hematol Oncol Stem Cell Res, 2018, 12: 77-83   |
| 1193 | Exploratory Dataset | Br J Cancer 2016 Nov 8;115(10):1193-1200             |



|      |                     |                                                  |
|------|---------------------|--------------------------------------------------|
| 1194 | Exploratory Dataset | J Child Psychol Psychiatry 2013 May;54(5):527-35 |
| 1195 | Exploratory Dataset | Lancet Oncol, 2012, 13: 1161-70                  |
| 1196 | Exploratory Dataset | Rheumatology (Oxford) 2012;51:1368-77            |
| 1197 | Exploratory Dataset | Health Technol Assess 2013 Feb;17(4):1-218       |
| 1198 | Exploratory Dataset | Breast Cancer Res Treat 2010 Jul;122(2):429-37   |
| 1199 | Exploratory Dataset | Lancet 2013 Mar 9;381(9869):805-16               |
| 1200 | Exploratory Dataset | Lancet Oncol 2015 Nov;16(15):1515-1524           |
| 1201 | Exploratory Dataset | BMC Fam Pract, 2002, 3: 10                       |
| 1202 | Exploratory Dataset | Lancet 2011 Jun 18;377(9783):2103-14             |
| 1203 | Exploratory Dataset | Lancet Oncol 2014 Jul;15(8):894-904              |
| 1204 | Exploratory Dataset | Ann Rheum Dis 2013 Jun;72(6):844-50              |
| 1205 | Exploratory Dataset | Lancet Oncol 2013 Jun;14(7):627-37               |
| 1206 | Exploratory Dataset | Ann Intern Med, 2008, 148: 268-77                |
| 1207 | Exploratory Dataset | Chest, 2016, 149: 1052-60                        |
| 1208 | Exploratory Dataset | N Engl J Med 2006 Feb 23;354(8):809-20           |
| 1209 | Exploratory Dataset | Lancet Oncol, 2014, 15: 620-30                   |
| 1210 | Exploratory Dataset | Br J Cancer 2014 Apr 29;110(9):2178-86           |
| 1211 | Exploratory Dataset | PLoS Med, 2009, 6: e1000191                      |
| 1212 | Exploratory Dataset | Lancet 2010 Jan 30;375(9712):377-84              |
| 1213 | Exploratory Dataset | N Engl J Med, 2011, 365: 2484-96                 |
| 1214 | Exploratory Dataset | Lancet Oncol 2013 Jul;14(8):749-59               |
| 1215 | Exploratory Dataset | Eur Respir J 2008 Sep;32(3):619-28               |
| 1216 | Exploratory Dataset | Cardiovasc Diabetol 2014 Mar 28;13:65            |
| 1217 | Exploratory Dataset | Lung Cancer 2012 Jun;76(3):362-7                 |

|      |                     |                                                |
|------|---------------------|------------------------------------------------|
| 1218 | Exploratory Dataset | Lancet Oncol 2013 Dec;14(13):1278-86           |
| 1219 | Exploratory Dataset | Gastric Cancer 2015 Oct;18(4):824-32           |
| 1220 | Exploratory Dataset | Adv Ther 2015 Apr;32(4):319-40                 |
| 1221 | Exploratory Dataset | Schizophr Res 2015 Feb;161(2-3):421-8          |
| 1222 | Exploratory Dataset | Aliment Pharmacol Ther 2013 Aug;38(3):264-73   |
| 1223 | Exploratory Dataset | Curr Med Res Opin 2014 Jul;30(7):1245-55       |
| 1224 | Exploratory Dataset | Gastroenterology 2015 Dec;149(7):1775-1783e2   |
| 1225 | Exploratory Dataset | Curr Med Res Opin 2018 Jun;34(6):981-994       |
| 1226 | Exploratory Dataset | Radiother Oncol 2014 Jan;110(1):126-31         |
| 1227 | Exploratory Dataset | Breast Cancer Res Treat 2010 Jun;121(2):379-87 |
| 1228 | Exploratory Dataset | Br J Cancer 2012 Jun 5;106(12):1934-9          |
| 1229 | Exploratory Dataset | Lancet Oncol 2010 Feb;11(2):121-8              |
| 1230 | Exploratory Dataset | Ann Oncol 2015 Jul;26(7):1401-8                |
| 1231 | Exploratory Dataset | Eur J Haematol, 2016, 96: 602-9                |
| 1232 | Exploratory Dataset | J Infect, 2010, 61: 410-8                      |
| 1233 | Exploratory Dataset | Lung Cancer 2015 Aug;89(2):146-53              |
| 1234 | Exploratory Dataset | Cancer Sci 2016 Dec;107(12):1843-1850          |
| 1235 | Exploratory Dataset | Brain 2015 Nov;138(Pt 11):3400-12              |
| 1236 | Exploratory Dataset | Front Psychiatry 2016 Jan 21;7:2               |
| 1237 | Exploratory Dataset | Dig Dis Sci 2018 Jul;63(7):1910-1919           |
| 1238 | Exploratory Dataset | J Clin Oncol 2010 Feb 10;28(5):753-60          |
| 1239 | Exploratory Dataset | J Diabetes Investig 2014 May 4; 5(3): 320–326  |
| 1240 | Exploratory Dataset | Diabetes Care 2017 Oct;40(10):1364-1372        |
| 1241 | Exploratory Dataset | Ann Oncol 2008 Jul;19(7):1288-1292             |

|      |                     |                                                              |
|------|---------------------|--------------------------------------------------------------|
| 1242 | Exploratory Dataset | Diabetes Obes Metab 2009 Jun;11(6):589-95                    |
| 1243 | Exploratory Dataset | Inflamm Bowel Dis 2017 Feb;23(2):261-271                     |
| 1244 | Exploratory Dataset | Alcohol Clin Exp Res 2007 Apr;31(4):625-34                   |
| 1245 | Exploratory Dataset | N Engl J Med 2005 Apr 21;352(16):1637-45                     |
| 1246 | Exploratory Dataset | N Engl J Med, 2000, 342: 1085-92                             |
| 1247 | Exploratory Dataset | J Clin Oncol 2008 Oct 20;26(30):4883-90                      |
| 1248 | Exploratory Dataset | J Clin Oncol 2006 Jul 1;24(19):3121-7                        |
| 1249 | Exploratory Dataset | J Clin Oncol 2003 Aug 15;21(16):3025-34                      |
| 1250 | Exploratory Dataset | J Am Acad Child Adolesc Psychiatry 2006 Nov;45(11):1294-1303 |
| 1251 | Exploratory Dataset | J Clin Oncol 2007 Apr 20;25(12):1539-44                      |
| 1252 | Exploratory Dataset | N Engl J Med, 2005, 353: 123-32                              |
| 1253 | Exploratory Dataset | Diabetes Care 2004 Nov;27(11):2628-35                        |
| 1254 | Exploratory Dataset | Gastroenterology 2006 Feb;130(2):323-33; quiz 591            |
| 1255 | Exploratory Dataset | J Clin Oncol 2007 Sep 20;25(27):4278-84                      |
| 1256 | Exploratory Dataset | J Clin Oncol 2009 Jul 10;27(20):3312-8                       |
| 1257 | Exploratory Dataset | Oncologist 2010;15(2):122-9                                  |
| 1258 | Exploratory Dataset | J Clin Oncol 2008 Dec 1;26(34):5544-52                       |
| 1259 | Exploratory Dataset | Gastroenterology 2007 Jan;132(1):52-65                       |
| 1260 | Exploratory Dataset | JAMA 2010 Nov 17;304(19):2154-60                             |
| 1261 | Exploratory Dataset | Int J Clin Pract 2005 Dec;59(12):1377-86                     |
| 1262 | Exploratory Dataset | Pediatr Infect Dis J 2007 Mar;26(3):201-9                    |
| 1263 | Exploratory Dataset | Int J Cardiol 2005 Jul 10;102(2):327-32                      |
| 1264 | Exploratory Dataset | Int J Clin Pract 2005 Jun;59(6):619-27                       |
| 1265 | Exploratory Dataset | J Clin Oncol 2009 Jul 10;27(20):3385-90                      |

|      |                     |                                                 |
|------|---------------------|-------------------------------------------------|
| 1266 | Exploratory Dataset | Diabet Med 2010 Mar;27(3):318-26                |
| 1267 | Exploratory Dataset | Drug Alcohol Depend 2010 Oct 1; 111(3): 200–206 |
| 1268 | Exploratory Dataset | Diabetes Obes Metab 2007 Sep;9(5):733-45        |
| 1269 | Exploratory Dataset | Lancet, 2005, 366: 1367-74                      |
| 1270 | Exploratory Dataset | J Am Acad Dermatol . 2007 Jan;56(1):31.e1-15    |
| 1271 | Exploratory Dataset | J Clin Oncol 2012 May 1;30(13):1534-40          |
| 1272 | Exploratory Dataset | J Thorac Oncol 2010 Dec;5(12):1977-85           |
| 1273 | Exploratory Dataset | J Clin Oncol 2007 May 1;25(13):1658-64          |
| 1274 | Exploratory Dataset | J Clin Oncol 2009 Feb 10;27(5):672-80           |
| 1275 | Exploratory Dataset | J Clin Oncol 2009 Sep 20;27(27):4487-91         |
| 1276 | Exploratory Dataset | J Clin Oncol 2009 Feb 10;27(5):663-71           |
| 1277 | Exploratory Dataset | Rheumatology (Oxford) 2007 Jul;46(7):1122-5     |
| 1278 | Exploratory Dataset | Lung Cancer 2008 Dec;62(3):334-43               |
| 1279 | Exploratory Dataset | Int J Gynecol Cancer Sep-Oct 2008;18(5):1013-9  |
| 1280 | Exploratory Dataset | Ann Oncol 2008 Apr;19(4):734-8                  |
| 1281 | Exploratory Dataset | Neurology 2008 Jul 22;71(4):265-71              |
| 1282 | Exploratory Dataset | J Am Acad Dermatol, 2004, 51: 534-42            |
| 1283 | Exploratory Dataset | J Clin Oncol 2010 Jan 1;28(1):49-55             |
| 1284 | Exploratory Dataset | Eur Neuropsychopharmacol 2005 Jan;15(1):111-7   |
| 1285 | Exploratory Dataset | Arch Pediatr Adolesc Med 2006 Jan;160(1):82-90  |
| 1286 | Exploratory Dataset | Clin Colorectal Cancer 2012 Jun;11(2):101-11    |
| 1287 | Exploratory Dataset | Mayo Clin Proc, 2005, 80: 470-9                 |
| 1288 | Exploratory Dataset | Pediatrics 2001 Oct;108(4):883-92               |
| 1289 | Exploratory Dataset | J Clin Psychopharmacol 2012 Oct;32(5):630-6     |

|      |                     |                                                       |
|------|---------------------|-------------------------------------------------------|
| 1290 | Exploratory Dataset | Am J Cardiol 2008 Dec 1;102(11):1489-94               |
| 1291 | Exploratory Dataset | J Med Econ, 2013, 16: 1061-70                         |
| 1292 | Exploratory Dataset | J Clin Oncol 2010 Apr 10;28(11):1835-42               |
| 1293 | Exploratory Dataset | J Child Adolesc Psychopharmacol 2009 Aug;19(4):351-61 |
| 1294 | Exploratory Dataset | Arthritis Rheum 2004 Jul;50(7):2264-72                |
| 1295 | Exploratory Dataset | J Thorac Oncol, 2013, 8: 79-88                        |
| 1296 | Exploratory Dataset | Gastroenterology 2012 May;142(5):1102-1111.e2         |
| 1297 | Exploratory Dataset | Diabetes Obes Metab 2009 Dec;11(12):1153-62           |
| 1298 | Exploratory Dataset | Ann Oncol 2014 Jul;25(7):1346-1355                    |
| 1299 | Exploratory Dataset | Clinical Therapeutics 2013;35(7):431-7                |
| 1300 | Exploratory Dataset | Int Clin Psychopharmacol 2015                         |
| 1301 | Exploratory Dataset | Aliment Pharmacol Ther 2007 Aug 1;26(3):421-30        |
| 1302 | Exploratory Dataset | Ann Oncol, 2013, 24: 702-9                            |
| 1303 | Exploratory Dataset | Arthritis Rheum, 2001, 44: 2539-47                    |
| 1304 | Exploratory Dataset | Prostate Cancer Prostatic Dis 2012 Mar;15(1):87-92    |
| 1305 | Exploratory Dataset | Clin Gastroenterol Hepatol 2007 Jan;5(1):95-102       |
| 1306 | Exploratory Dataset | J Bone Miner Res 2011 Jun;26(6):1303-12               |
| 1307 | Exploratory Dataset | Gastroenterology 2007 Jan;132(1):66-75; quiz 432-3    |
| 1308 | Exploratory Dataset | Am J Cardiol 2004 Jun 15;93(12):1481-6                |
| 1309 | Exploratory Dataset | Clin Ther 2007 Mar;29(3):450-63                       |
| 1310 | Exploratory Dataset | Heart Rhythm, 2012, 9: 172-8                          |
| 1311 | Exploratory Dataset | Nicotine Tob Res 2011 Oct;13(10):955-64               |
| 1312 | Exploratory Dataset | J Bone Miner Res 2009 Apr;24(4):719-25                |
| 1313 | Exploratory Dataset | J Rheumatol 2007 May;34(5):1040-50                    |

|      |                     |                                                    |
|------|---------------------|----------------------------------------------------|
| 1314 | Exploratory Dataset | J Cardiovasc Med (Hagerstown) 2008 Jul;9(7):688-93 |
| 1315 | Exploratory Dataset | J Thorac Oncol, 2014, 9: 214-21                    |
| 1316 | Exploratory Dataset | J Allergy Clin Immunol 2005 Dec;116(6):1289-95     |
| 1317 | Exploratory Dataset | J Thorac Oncol 2014 May;9(5):733-7                 |
| 1318 | Exploratory Dataset | Ann Rheum Dis 2013 Sep 1;72(9):1488-95             |
| 1319 | Exploratory Dataset | J Am Acad Dermatol, 2012, 67: 86-92                |
| 1320 | Exploratory Dataset | Lung Cancer, 2016, 102: 65-73                      |
| 1321 | Exploratory Dataset | Eur Neuropsychopharmacol 2013 Nov;23(11):1432-42   |
| 1322 | Exploratory Dataset | Nicotine Tob Res 2011 Sep;13(9):820-6              |
| 1323 | Exploratory Dataset | Ann Oncol 2013 Mar;24(3):718-25                    |
| 1324 | Exploratory Dataset | J Gastroenterol 2014 Feb;49(2):283-94              |
| 1325 | Exploratory Dataset | Diabetes Obes Metab 2012 Oct;14(10):910-7          |
| 1326 | Exploratory Dataset | J Drugs Dermatol 2013;12:166-74                    |
| 1327 | Exploratory Dataset | Nicotine Tob Res 2014 Jan;16(1):50-7               |
| 1328 | Exploratory Dataset | Am J Gastroenterol 2016 Nov;111(11):1599-1607      |
| 1329 | Exploratory Dataset | Chin Med J (Engl), 2012, 125: 1845-51              |
| 1330 | Exploratory Dataset | J Dermatolog Treat, 2014, 25: 57-60                |
| 1331 | Exploratory Dataset | Curr Med Res Opin, 2010, 26: 1277-84               |
| 1332 | Exploratory Dataset | Dermatol Surg, 2014, 40: 1181-90                   |
| 1333 | Exploratory Dataset | Diabetes Obes Metab 2014 May;16(5):403-9           |
| 1334 | Exploratory Dataset | Diabetes Obes Metab 2014 Nov;16(11):1102-10        |
| 1335 | Exploratory Dataset | Arthritis Rheumatol 2016 Jan;68(1):46-55           |
| 1336 | Exploratory Dataset | J Neurooncol 2017 Jan;131(1):105-115               |
| 1337 | Exploratory Dataset | J Clin Hypertens (Greenwich) 2016 Jan;18(1):43-52  |

|      |                     |                                                     |
|------|---------------------|-----------------------------------------------------|
| 1338 | Exploratory Dataset | Diabetes Obes Metab 2016 Aug;18(8):812-9            |
| 1339 | Exploratory Dataset | N Engl J Med, 2005, 352: 1425-35                    |
| 1340 | Exploratory Dataset | Oral Oncol 2014 May;50(5):498-505                   |
| 1341 | Validation Dataset  | N Engl J Med. 2007 Aug 30;357(9):874-84             |
| 1342 | Validation Dataset  | J Assoc Physicians India. 2008 Jun;56:418-24        |
| 1343 | Validation Dataset  | J Am Coll Surg. 2009 Jan;208(1):1-13                |
| 1344 | Validation Dataset  | Obstet Gynecol. 2008 Mar;111(3):639-47              |
| 1345 | Validation Dataset  | Rev Esp Cardiol. 2009 Apr;62(4):400-8               |
| 1346 | Validation Dataset  | Vaccine. 2009 Jan 29;27(5):765-72                   |
| 1347 | Validation Dataset  | Lancet. 2009 Apr 4;373(9670):1183-9                 |
| 1348 | Validation Dataset  | Kardiol Pol. 2009 Feb;67(2):123-7; discussion 128-9 |
| 1349 | Validation Dataset  | Circulation. 2010 Jan 5;121(1):143-50               |
| 1350 | Validation Dataset  | Lancet Oncol. 2011 Jan;12(1):30-7                   |
| 1351 | Validation Dataset  | N Engl J Med. 2010 Dec 9;363(24):2310-9             |
| 1352 | Validation Dataset  | J Bone Miner Res. 2010 Nov;25(11):2368-73           |
| 1353 | Validation Dataset  | Ann Intern Med. 2010 Jun 15;152(12):761-9           |
| 1354 | Validation Dataset  | Ann Surg. 2011 Mar;253(3):495-501                   |
| 1355 | Validation Dataset  | Am J Med. 2011 May;124(5):434-43                    |
| 1356 | Validation Dataset  | J Clin Psychiatry. 2011 Feb;72(2):168-74            |
| 1357 | Validation Dataset  | Eur Neuropsychopharmacol. 2011 Mar;21(3):221-9      |
| 1358 | Validation Dataset  | Clin Ther. 2012 Jan;34(1):77-90                     |
| 1359 | Validation Dataset  | Psychosom Med. 2012 Jul-Aug;74(6):628-34            |
| 1360 | Validation Dataset  | ANZ J Surg. 2012 Sep;82(9):630-2                    |
| 1361 | Validation Dataset  | Am J Obstet Gynecol. 2012 May;206(5):431.e1-5       |

|      |                    |                                                           |
|------|--------------------|-----------------------------------------------------------|
| 1362 | Validation Dataset | Blood. 2012 Sep 27;120(13):2581-8                         |
| 1363 | Validation Dataset | Diabetologia. 2012 Jan;55(1):105-13                       |
| 1364 | Validation Dataset | J Clin Psychiatry. 2012 Jul;73(7):984-91                  |
| 1365 | Validation Dataset | Lancet Oncol. 2013 Dec;14(13):1317-25                     |
| 1366 | Validation Dataset | N Engl J Med. 2013 Sep 12;369(11):1023-34                 |
| 1367 | Validation Dataset | Antiinflamm Antiallergy Agents Med Chem. 2013;12(3):223-8 |
| 1368 | Validation Dataset | J Aerosol Med Pulm Drug Deliv. 2014 Apr;27(2):133-7       |
| 1369 | Validation Dataset | Int J Antimicrob Agents. 2013 Jan;41(1):57-64             |
| 1370 | Validation Dataset | J Psychiatr Res. 2013 Jan;47(1):113-21                    |
| 1371 | Validation Dataset | Ann Oncol. 2013 Jun;24(6):1505-12                         |
| 1372 | Validation Dataset | J Cardiovasc Electrophysiol. 2013 Apr;24(4):442-8         |
| 1373 | Validation Dataset | Surg Endosc. 2015 Mar;29(3):692-9                         |
| 1374 | Validation Dataset | Pain. 2014 Dec;155(12):2510-2516                          |
| 1375 | Validation Dataset | J Am Coll Cardiol. 2014 Jun 17;63(23):2560-2568           |
| 1376 | Validation Dataset | Sleep Med. 2014 Oct;15(10):1276-8                         |
| 1377 | Validation Dataset | Vaccine. 2015 Feb 11;33(7):933-41                         |
| 1378 | Validation Dataset | Diabetes Care. 2014 Feb;37(2):e28-9                       |
| 1379 | Validation Dataset | Dement Geriatr Cogn Disord. 2014;37(3-4):232-45           |
| 1380 | Validation Dataset | Ocul Surf. 2014 Apr;12(2):146-54                          |
| 1381 | Validation Dataset | N Engl J Med. 2014 Aug 21;371(8):711-22                   |
| 1382 | Validation Dataset | Aliment Pharmacol Ther. 2015 Jun;41(11):1132-40           |
| 1383 | Validation Dataset | Am J Prev Med. 2015 Jan;48(1):1-12                        |
| 1384 | Validation Dataset | Appetite. 2015 Jan;84:154-60                              |
| 1385 | Validation Dataset | J Card Fail. 2016 Jul;22(7):529-36                        |



|      |                    |                                                              |
|------|--------------------|--------------------------------------------------------------|
| 1386 | Validation Dataset | Hypertension. 2015 Feb;65(2):313-9                           |
| 1387 | Validation Dataset | Eur J Cancer. 2015 Jan;51(1):45-54                           |
| 1388 | Validation Dataset | Am Heart J. 2016 Feb;172:88-95                               |
| 1389 | Validation Dataset | Ann Oncol. 2015 Feb;26(2):313-20                             |
| 1390 | Validation Dataset | Surg Endosc. 2016 Jan;30(1):204-14                           |
| 1391 | Validation Dataset | Cancer. 2016 Jan 15;122(2):287-95                            |
| 1392 | Validation Dataset | Contemp Clin Trials. 2016 Sep;50:45-53                       |
| 1393 | Validation Dataset | J Clin Oncol. 2016 Jun 10;34(17):2046-53                     |
| 1394 | Validation Dataset | Am J Respir Crit Care Med. 2016 Aug 15;194(4):486-92         |
| 1395 | Validation Dataset | Nutr Metab Cardiovasc Dis. 2016 Apr;26(4):302-9              |
| 1396 | Validation Dataset | Chin Med J (Engl). 2016 Nov 20;129(22):2647-2651             |
| 1397 | Validation Dataset | Ann Behav Med. 2016 Oct;50(5):751-761                        |
| 1398 | Validation Dataset | J Rehabil Res Dev. 2016;53(1):107-16                         |
| 1399 | Validation Dataset | Eur J Cancer. 2016 Jan;52:173-80                             |
| 1400 | Validation Dataset | Am J Sports Med. 2016 Dec;44(12):3119-3125                   |
| 1401 | Validation Dataset | Gastroenterology. 2018 Feb;154(3):529-539.e2                 |
| 1402 | Validation Dataset | Eur J Prev Cardiol. 2017 Sep;24(14):1544-1554                |
| 1403 | Validation Dataset | Circ Cardiovasc Interv. 2017 Apr;10(4):e004460               |
| 1404 | Validation Dataset | Zhonghua Xin Xue Guan Bing Za Zhi. 2017 Mar 24;45(3):190-197 |
| 1405 | Validation Dataset | J Clin Oncol. 2018 Jun 10;36(17):1658-1667                   |
| 1406 | Validation Dataset | Arch Phys Med Rehabil. 2017 Aug;98(8):1499-1507.e2           |
| 1407 | Validation Dataset | Ann Rheum Dis. 2018 Feb;77(2):212-220                        |
| 1408 | Validation Dataset | Aliment Pharmacol Ther. 2017 Feb;45(3):391-402               |
| 1409 | Validation Dataset | Ann Allergy Asthma Immunol. 2017 Aug;119(2):189-190          |

|      |                    |                                                           |
|------|--------------------|-----------------------------------------------------------|
| 1410 | Validation Dataset | J Child Adolesc Psychopharmacol. 2018 Jun;28(5):322-330   |
| 1411 | Validation Dataset | Interact Cardiovasc Thorac Surg. 2018 May 1;26(5):790-797 |
| 1412 | Validation Dataset | Lancet Gastroenterol Hepatol. 2018 Dec;3(12):845-855      |
| 1413 | Validation Dataset | N Engl J Med. 2018 Apr 5;378(14):1277-1290                |
| 1414 | Validation Dataset | Blood Adv. 2018 Nov 13;2(21):2837-2847                    |
| 1415 | Validation Dataset | Eur J Nutr. 2018 Feb;57(1):243-250                        |
| 1416 | Validation Dataset | Ann Rheum Dis. 2018 Dec;77(12):1710-1719                  |
| 1417 | Validation Dataset | Haematologica. 2018 Dec;103(12):2079-2087                 |
| 1418 | Validation Dataset | Diabet Med. 2018 Apr;35(4):483-490                        |
| 1419 | Validation Dataset | Int J Obes (Lond). 2019 Jul;43(7):1485-1490               |
| 1420 | Validation Dataset | Probiotics Antimicrob Proteins. 2019 Dec;11(4):1195-1201  |
| 1421 | Validation Dataset | J Trauma Acute Care Surg. 2019 Feb;86(2):181-188          |
| 1422 | Validation Dataset | J Am Pharm Assoc (2003). 2020 Mar-Apr;60(2):344-351.e2    |
| 1423 | Validation Dataset | Headache. 2019 Jul;59(7):1052-1062                        |
| 1424 | Validation Dataset | Thorax. 2019 Feb;74(2):197-199                            |
| 1425 | Validation Dataset | Blood. 2019 Mar 7;133(10):1011-1019                       |
| 1426 | Validation Dataset | Thromb Haemost. 2019 Jul;119(7):1171-1181                 |
| 1427 | Validation Dataset | Lancet Oncol. 2020 Jan;21(1):162-174                      |
| 1428 | Validation Dataset | Br J Ophthalmol. 2020 Sep;104(9):1223-1227                |
| 1429 | Validation Dataset | J Consult Clin Psychol. 2019 Apr;87(4):370-379            |
| 1430 | Validation Dataset | Am J Cardiol. 2020 Feb 15;125(4):485-490                  |
| 1431 | Validation Dataset | JACC Heart Fail. 2020 May;8(5):359-368                    |
| 1432 | Validation Dataset | Eur J Nutr. 2020 Apr;59(3):1163-1170                      |
| 1433 | Validation Dataset | Med Gas Res. 2020 Jan-Mar;10(1):1-7                       |

|      |                    |                                                               |
|------|--------------------|---------------------------------------------------------------|
| 1434 | Validation Dataset | JAMA Otolaryngol Head Neck Surg. 2020 Nov 1;146(11):1006-1014 |
| 1435 | Validation Dataset | Cephalalgia. 2020 Nov;40(13):1523-1531                        |
| 1436 | Validation Dataset | Lancet. 2020 Apr 11;395(10231):1217-1224                      |
| 1437 | Validation Dataset | Ann Neurol. 2020 Aug;88(2):264-273                            |
| 1438 | Validation Dataset | Lancet. 2020 Dec 5;396(10265):1807-1816                       |

**eTable 4.** List of excluded studies in validation dataset (with reasons)

| <b>Exclusion list</b> |                                                                                                                                                                                      | <b>Reasons for exclusion</b>                                                |
|-----------------------|--------------------------------------------------------------------------------------------------------------------------------------------------------------------------------------|-----------------------------------------------------------------------------|
| 1                     | Early experiences and predictors of recruitment success for the National Children's Study. <i>Pediatrics</i> . 2011 Feb;127(2):261-8. doi: 10.1542/peds.2010-2334. Epub 2011 Jan 24. | This study, identified by PubMed as RCT, should be a cohort study.          |
| 2                     | The role of conventional bronchoscopy in the workup of suspicious CT scan screen-detected pulmonary nodules. <i>Chest</i> . 2012 Aug;142(2):377-384. doi: 10.1378/chest.11-2030.     | This study, identified by PubMed as RCT, should be a cross-sectional study. |
