# Supplementary material for: Discordant Information on Blinding in Trial Registries and Published Research: A Systematic Review
Source: PubMed Central journal article supplement (PMC11672156; doi:10.1001/jamanetworkopen.2024.52274), 2024-12-26
Supplement: jamanetwopen-e2452274-s002.pdf [file jamanetwopen-e2452274-s002.pdf]

## Data Sharing Statement

Zhang. Discordant Information on Blinding in Trial Registries and Research Papers. *JAMA Netw Open*. Published December 26, 2024. doi:10.1001/jamanetworkopen.2024.52274

### Data

**Data available:** Yes

**Data types:** Data (not involving human participants)

**How to access data:** The datasets used and analysed during the current study are available from the corresponding author on reasonable request. Email: [wu\\_yunhong@163.com](mailto:wu_yunhong@163.com)

**When available:** With publication

### Supporting Documents

**Document types:** None

### Additional Information

**Who can access the data:** anyone requesting the data

**Types of analyses:** on reasonable request

**Mechanisms of data availability:** with a signed data access agreement
